# Supplementary material for: Development of an aquacatalytic system based on the formation of vesicles of an amphiphilic palladium NNC-pincer complex
Source: Royal Society of Chemistry journal article supplement (doi:10.1039/c5dt00434a), 2015-01-01
Supplement: c5dt00434a1.pdf [file c5dt00434a1.pdf]

## Supporting Information

### Development of an aquacatalytic system based on the formation of vesicles of an amphiphilic palladium NNC-pincer complex

Fumie Sakurai,<sup>a,b</sup> Go Hamasaka,<sup>a,b</sup> and Yasuhiro Uozumi<sup>\*a,b,c</sup>

<sup>a</sup>Institute for Molecular Science, Okazaki 444-8787, Japan

<sup>b</sup>The Graduate University for Advanced Studies, Okazaki 444-8787, Japan

<sup>c</sup>Green Nanocatalysis Research Team, RIKEN, Center for Sustainable Resource Science, Wako 351-0198, Japan

#### Table of Contents

|                                                                                              |         |
|----------------------------------------------------------------------------------------------|---------|
| General information                                                                          | S2      |
| Synthesis of amphiphilic palladium NNC-pincer complex <b>2a</b>                              | S3–S5   |
| Synthesis of amphiphilic palladium NNC-pincer complex <b>2b</b>                              | S5–S8   |
| Preparation of vesicles <b>2a<sub>vscf</sub></b> and <b>2b<sub>vscf</sub></b>                | S8–S9   |
| Additional TEM images                                                                        | S10–S11 |
| Typical procedure and characterization of the products for the arylation of terminal alkynes | S11–S12 |
| References                                                                                   | S13     |
| <sup>1</sup> H-NMR and <sup>13</sup> C-NMR spectra                                           | S14–S30 |

## General information

When manipulations were performed under a nitrogen atmosphere, nitrogen gas was dried by passage through  $P_2O_5$ . Commercially available chemicals (purchased from Sigma-Aldrich, TCI, Kanto chemical, Wako Pure Chemical Industries, Nacalai tesque, and Merck) are used without further purification unless otherwise noted. Silica gel was purchased from Kanto chemical (Silica gel 60N, spherical neutral, particle size 40-50  $\mu\text{m}$ ) or Yamazen corporation (Hi-Flash<sup>TM</sup> Column Silica gel 40 mm 60  $\text{\AA}$ ). Aluminium oxide was purchased from Merck (Aluminium oxide active basic, particle size 0.063-0.200 mm). TLC plates were purchased from Merck (TLC Silica gel 60 F<sub>254</sub> and TLC Aluminium oxide 150 F<sub>254</sub>). NMR spectra were recorded on a JEOL JNM A-500 spectrometer (500 MHz for  $^1\text{H}$ , 125 MHz for  $^{13}\text{C}$ ) or a JEOL JNM ECS-400 spectrometer (396 MHz for  $^1\text{H}$ , 100 MHz for  $^{13}\text{C}$ ). Chemical shifts are reported in  $\delta$  (ppm) referenced to an internal tetramethylsilane standard for  $^1\text{H}$  NMR. Chemical shifts of  $^{13}\text{C}$  NMR are given related to  $\text{CDCl}_3$  as an internal standard ( $\delta$  77.0).  $^1\text{H}$  and  $^{13}\text{C}$  NMR spectra were recorded in  $\text{CDCl}_3$  at 25  $^\circ\text{C}$ . GC-MS analyses were measured with an Agilent 6890 GC/5973N MS Detector. ESI mass spectra (LRMS and HRMS) were recorded on a JEOL JMS-T100LC spectrometer. Elemental analyses were performed on a J-SCIENCE LAB MICRO CORDER JM10. Melting points were determined using a Yanaco micro melting point apparatus MP-J3 and were uncorrected. IR spectra were obtained using a JASCO FT/IR-460plus spectrometer in ATR mode. Dynamic light scatterings (DLS) were observed on an Otsuka electronics Co. DLS-6100P system using He-Ne 10 mW 632.8 nm laser. Transmission electron microscopy (TEM) images were obtained using a JEOL JEM-2100F operated at 200 kV. Atomic force microscopy (AFM) observations were performed using an Agilent Technologies Pico-Scan2500 in conventional tapping mode under air. Fluorescence microscopy images were obtained using a Keyence BZ-8000 with a x60 oil immersion objective lens. Confocal laser scanning microscopy (CLSM) images were obtained using a Nikon A1R with a x100 oil immersion objective lens. Millipore water was obtained from a Millipore Milli-Q Academic A10 purification unit. 1,10-Phenanthroline-5,6-diol (**3**),<sup>1</sup> *p*-bromo-[2-{2-(2-methoxyethoxy)ethoxy}ethoxy]benzene<sup>2</sup> and complex **14**<sup>3</sup> were prepared by literature methods. Theoretical calculations were carried out using the Gaussian 09 program<sup>4</sup> with RHF method. The geometry of palladium NNC pincer complexes **2a** and **2b** were optimized by using a STO-3G basis set.

## Synthesis of amphiphilic NNC pincer palladium complex 2a

### 5,6-Bis[2-[2-(2-methoxyethoxy)ethoxy]ethoxy]-1,10-phenanthroline (4).

Under a nitrogen atmosphere, to a mixture of 1,10-phenanthroline-5,6-diol (**3**) (1.72 g, 8.10 mmol) and sodium hydride (712.0 mg, 17.8 mmol, 60% oil) was added anhydrous DMF (70 mL) at 0 °C. After being stirred at 25 °C for 25 min, [2-[2-(2-methoxyethoxy)ethoxy]ethoxy] *p*-toluenesulfonate (5.7 g, 17.8 mmol) was slowly added at 0 °C. The reaction mixture was stirred at 80 °C for 24 h and quenched with water (100 mL). The resulting mixture was extracted with dichloromethane (20 mL, 3 times). The combined organic layer was washed with water (20 mL) and brine (20 mL), and dried over Na<sub>2</sub>SO<sub>4</sub>. After removal of the solvent, the resulting residue was chromatographed on aluminium oxide (eluent 1% MeOH/CHCl<sub>3</sub>) to give **4** (2.3 g, 4.60 mmol, 55% yield) as brown oil. <sup>1</sup>H-NMR (500 MHz, CDCl<sub>3</sub>): δ 9.12 (dd, *J* = 1.8, 4.3 Hz, 2H, phen 2,9-H), 8.73 (dd, *J* = 1.8, 8.5 Hz, 2H, phen 4,7-H), 7.64 (dd, *J* = 4.3, 8.5 Hz, 2H, phen 3,8-H), 4.45–4.47 (m, 4H, -OCH<sub>2</sub>CH<sub>2</sub>(OCH<sub>2</sub>CH<sub>2</sub>)<sub>2</sub>OCH<sub>3</sub>), 3.84–3.86 (m, 4H, -C<sub>2</sub>H<sub>4</sub>O-), 3.64–3.72 (m, 12H, -C<sub>2</sub>H<sub>4</sub>O-), 3.54–3.55 (m, 4H, -C<sub>2</sub>H<sub>4</sub>O-), 3.38 (s, 6H, -OCH<sub>3</sub>). <sup>13</sup>C-NMR (125 MHz, CDCl<sub>3</sub>): δ 149.06, 144.08, 141.83, 130.68, 126.04, 122.73, 72.46, 71.73, 70.48, 70.41, 70.39, 58.80. IR (ATR): 2872, 1612, 1457, 1425, 1322, 1104, 1070, 1029, 810, 744 cm<sup>-1</sup>. ESI-MS *m/z* 527 ([M+Na]<sup>+</sup>), 505 ([M+1]<sup>+</sup>). HR-ESI-MS calcd for C<sub>26</sub>H<sub>37</sub>N<sub>2</sub>O<sub>8</sub> *m/z* 505.2550, found 505.2552.

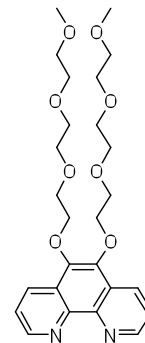

### 2-(4-Dodecylphenyl)-5,6-bis[2-[2-(2-methoxyethoxy)ethoxy]ethoxy]-1,10-phenanthroline (5).

Under a nitrogen atmosphere, 0.49 mL (1.1 mmol) of 2.3 M *n*-BuLi in hexane was slowly added to a degassed solution of 4-bromododecylbenzene (357.9 mg, 1.10 mmol) in anhydrous diethyl ether (8 mL) at -10 °C. After being stirred at -10 °C for 2 h, the solution was added dropwise to a degassed solution of **4** (504.6 mg, 1.00 mmol) in anhydrous toluene (20 mL). The reaction mixture was stirred at -10 °C for 30 min and quenched with water (1 mL). The resulting mixture was extracted with dichloromethane (20 mL, 3 times). The combined organic layer was dried over Na<sub>2</sub>SO<sub>4</sub> and concentrated under reduced pressure. The resulting residue was dissolved in dichloromethane (30 mL). Activated MnO<sub>2</sub> (Merck, catalog No. 8.05958.0100, 1.5 g, 17.3 mmol) was added to the solution. After being stirred at 25 °C for 1 h, the reaction mixture was filtered through Celite and eluted with dichloromethane. The filtrate was concentrated under reduced pressure. The resulting residue was chromatographed on silica gel (eluent 0-3% MeOH/EtOAc) to give **5** (399.1 mg, 0.533 mmol, 55% yield) as light brown oil. <sup>1</sup>H-NMR (396 MHz, CDCl<sub>3</sub>): δ 9.16 (dd, *J* = 1.4, 4.5 Hz, 1H, phen 9-H), 8.76 (d, *J* = 8.9 Hz, 2H, phen 4-H), 8.73 (dd, *J* = 1.4, 8.1 Hz, 1H, phen 7-H), 8.24 (d, *J* = 8.2 Hz, 2H, *o*-H), 8.10 (d, *J* = 8.9 Hz, 1H, phen 3-H), 7.63 (dd, *J* = 4.5, 8.1 Hz, 1H, phen 8-H), 7.34 (d, *J* = 8.2 Hz, 2H, *m*-H), 4.45–4.49 (m, 4H, -OCH<sub>2</sub>CH<sub>2</sub>(OCH<sub>2</sub>CH<sub>2</sub>)<sub>2</sub>OCH<sub>3</sub>), 3.85–3.88 (m, 4H, -C<sub>2</sub>H<sub>4</sub>O-), 3.65–3.71 (m, 12H, -C<sub>2</sub>H<sub>4</sub>O-), 3.54–3.56 (m, 4H, -C<sub>2</sub>H<sub>4</sub>O-), 3.38 (s, 3H, -OCH<sub>3</sub>), 3.37 (s, 3H, -OCH<sub>3</sub>), 2.69 (t, *J* = 7.7 Hz, 2H, -CH<sub>2</sub>C<sub>11</sub>H<sub>23</sub>), 1.63–1.70 (m, 2H, -CH<sub>2</sub>CH<sub>2</sub>C<sub>10</sub>H<sub>21</sub>), 1.27–1.37 (m, 18 H, -CH<sub>2</sub>CH<sub>2</sub>(CH<sub>2</sub>)<sub>9</sub>CH<sub>3</sub>), 0.88

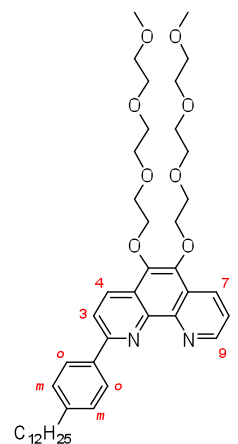

(t,  $J = 6.7$  Hz, 3H,  $-(CH_2)_{11}CH_3$ ).  $^{13}C$ -NMR (96 MHz,  $CDCl_3$ ):  $\delta$  156.75, 149.35, 144.45, 144.29, 144.18, 142.21, 141.59, 137.09, 131.64, 130.89, 128.87, 127.78, 126.55, 124.85, 122.72, 120.43, 71.97, 70.72, 70.65, 70.36, 59.06, 35.80, 31.93, 31.45, 29.69, 29.66, 29.64, 29.56, 29.37, 29.30, 22.71, 14.14. IR (ATR): 2923, 2853, 1614, 1453, 1323, 1108, 1071, 1030, 819, 762  $cm^{-1}$ . ESI-MS  $m/z$  771 ( $[M+Na]^+$ ), 749 ( $[M+H]^+$ ). Anal. Calcd for  $C_{44}H_{64}N_2O_8$ : C, 70.56; H, 8.61; N, 3.74; Found: C, 70.20; H, 8.60; N, 3.59.

### 2,9-Bis(4-dodecylphenyl)-5,6-bis[2-[2-(2-methoxyethoxy)ethoxy]ethoxy]-1,10-phenanthroline (6).

Under a nitrogen atmosphere, 64.2  $\mu$ L (0.165 mmol) of 2.6 M *n*-BuLi in hexane was slowly added to a degassed solution of 4-bromododecylbenzene (53.7 mg, 0.165 mmol) in anhydrous diethyl ether (1.6 mL) at  $-10$   $^{\circ}C$ . After being stirred at  $-10$   $^{\circ}C$  for 1 h, the resulting solution was added dropwise to a degassed solution of **5** (112.3 mg, 0.150 mmol) in anhydrous toluene (5 mL). The reaction mixture was stirred at  $-10$   $^{\circ}C$  for 1 h and quenched with water (1 mL). The resulting mixture was extracted with dichloromethane (5 mL, 3 times). The combined organic layer was dried over  $Na_2SO_4$  and concentrated under reduced pressure. The resulting residue was dissolved in dichloromethane (15 mL). Activated  $MnO_2$  (Merck, catalog No. 8.05958.0100, 1.5 g, 17.3 mmol) was added to the solution. After being stirred at  $25$   $^{\circ}C$  for 11 h, the reaction mixture was filtered through Celite and eluted with dichloromethane. The filtrate was concentrated under reduced pressure. The resulting residue was chromatographed on silica gel (eluent 5-10% MeOH/EtOAc) to give **6** (71.1 mg, 0.0716 mmol, 52% yield) as yellow oil.  $^1H$ -NMR (500 MHz,  $CDCl_3$ ):  $\delta$  8.74 (d,  $J = 8.5$  Hz, 2H, phen 4-H and 7-H), 8.37 (d,  $J = 8.5$  Hz, 4H, *o*-H), 8.13 (d,  $J = 8.5$  Hz, 2H, phen 3-H and 8-H), 7.39 (d,  $J = 8.5$  Hz, 4H, *m*-H), 4.47–4.49 (m, 4H,  $-OCH_2CH_2(OCH_2CH_2)_2OCH_3$ ), 3.87–3.86 (m, 4H,  $-C_2H_4O-$ ), 3.73–3.66 (m, 12H,  $-C_2H_4O-$ ), 3.57–3.55 (m, 4H,  $-C_2H_4O-$ ), 3.37 (s, 6H,  $-OCH_3$ ), 2.71 (t,  $J = 7.4$  Hz, 4H,  $-CH_2C_{11}H_{23}$ ), 1.72–1.67 (m, 4H,  $-CH_2CH_2C_{10}H_{21}$ ), 1.40–1.27 (m, 36 H,  $-CH_2CH_2(CH_2)_9CH_3$ ), 0.88 (t,  $J = 7.3$  Hz, 6H,  $-(CH_2)_{11}CH_3$ ).  $^{13}C$ -NMR (125 MHz,  $CDCl_3$ ):  $\delta$  155.88, 144.29, 144.21, 141.80, 136.97, 131.59, 128.85, 127.45, 125.06, 119.64, 72.61, 71.96, 70.72, 70.64, 70.63, 70.36, 70.13, 59.03, 35.82, 31.90, 31.81, 29.66, 29.62, 29.60, 29.54, 29.33, 29.31, 22.66, 14.09. IR (ATR): 2923, 2852, 1615, 1488, 1464, 1329, 1188, 1100, 1078, 1038, 830, 771  $cm^{-1}$ . ESI-MS  $m/z$  994 ( $[M+H]^+$ ). Anal. Calcd for  $C_{62}H_{92}N_2O_8 \cdot 0.5H_2O$ : C, 74.29; H, 9.35; N, 2.79; Found: C, 74.46; H, 9.33; N, 2.87.

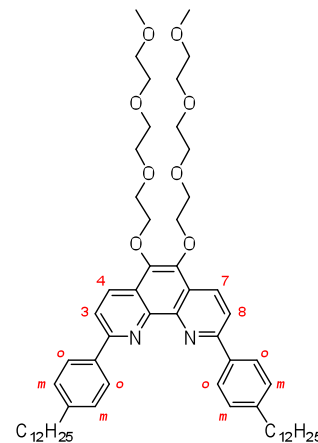

**Chloro-[5-dodecyl-2-{9-(4-dodecylphenyl)-5,6-bis(2-(2-(2-methoxyethoxy)ethoxy)ethoxy)-1,10-phenanthroline-2-yl}phenyl]palladium (2a).**

To a solution of **6** (49.7 mg, 0.050 mmol) in methanol (1.5 mL) was added  $\text{PdCl}_2(\text{MeCN})_2$  (13.0 mg, 0.0501 mmol), and the reaction mixture was stirred at 50 °C for 6 h. After removal of the solvent, the residue was chromatographed on aluminium oxide (eluent: 20% acetone/ $\text{CH}_2\text{Cl}_2$ ) to give **2a** (44.9 mg, 0.0396 mmol, 79%) as yellow oil.  $^1\text{H-NMR}$  (396 MHz,  $\text{CDCl}_3$ )  $\delta$  8.79 (d,  $J$  = 8.6 Hz, 1H, phen 4-H), 8.74 (d,  $J$  = 8.6 Hz, 1H, phen 7-H), 7.89 (d,  $J$  = 8.6 Hz, 1H, phen 8-H), 7.85 (d,  $J$  = 8.6 Hz, 1H, phen 3-H), 7.80 (d,  $J$  = 8.2 Hz, 2H, *o*-H), 7.75 (d,  $J$  = 1.6 Hz, 1H, *m''*-H), 7.38 (d,  $J$  = 8.0 Hz, 1H, *o'*-H), 7.37 (d,  $J$  = 8.2 Hz, 2H, *m*-H), 6.92 (dd,  $J$  = 1.6, 8.0 Hz, 1H, *m'*-H), 4.50–4.46 (m, 4H,  $-\text{OCH}_2\text{CH}_2(\text{OC}_2\text{H}_4)_2\text{OCH}_3$ ), 3.85–3.82 (m, 4H,  $-(\text{OC}_2\text{H}_4)_3\text{OCH}_3$ ), 3.72–3.64 (m, 12H,  $-(\text{OC}_2\text{H}_4)_3\text{OCH}_3$ ), 3.58–3.53 (m, 4H,  $-(\text{OC}_2\text{H}_4)_3\text{OCH}_3$ ), 3.38 (s, 3H,  $-\text{OCH}_3$ ), 3.34 (s, 3H,  $-\text{OCH}_3$ ), 2.72 (t,  $J$  = 7.9 Hz, 2H,  $-\text{CH}_2\text{C}_{11}\text{H}_{23}$ ), 2.55 (t,  $J$  = 7.9 Hz, 2H,  $-\text{CH}_2\text{C}_{11}\text{H}_{23}$ ), 1.70 (quint,  $J$  = 7.7 Hz, 2H,  $-\text{CH}_2\text{CH}_2\text{C}_{10}\text{H}_{21}$ ), 1.63–1.58 (m, 2H,  $-\text{CH}_2\text{CH}_2\text{C}_{10}\text{H}_{21}$ ), 1.41–1.25 (m, 36H,  $-\text{CH}_2\text{CH}_2(\text{CH}_2)_9\text{CH}_3$ ), 0.90–0.86 (m, 6H,  $-(\text{CH}_2)_{11}\text{CH}_3$ ).  $^{13}\text{C-NMR}$  (100 MHz,  $\text{CDCl}_3$ )  $\delta$  162.39, 161.71, 151.01, 146.36, 144.92, 144.71, 144.34, 142.76, 142.52, 142.34, 137.51, 135.47, 132.85, 132.66, 129.81, 128.29, 127.02, 126.07, 124.88, 124.29, 124.15, 118.15, 73.07, 71.96, 71.90, 70.69, 70.63, 70.59, 70.11, 59.06, 59.03, 36.63, 35.97, 31.93, 31.40, 29.71, 29.68, 29.65, 29.57, 29.49, 29.36, 22.70, 14.15. IR (ATR): 2922, 2852, 1615, 1581, 1448, 1335, 1103, 1083, 1051, 836, 816  $\text{cm}^{-1}$ . ESI-MS  $m/z$  1098 ( $[\text{M}-\text{Cl}]^+$ ). Anal. Calcd for  $\text{C}_{62}\text{H}_{91}\text{ClN}_2\text{O}_8\text{Pd}$ : C, 65.65; H, 8.09; N, 2.47%. Found: C, 65.28; H, 8.03; N, 2.50%.

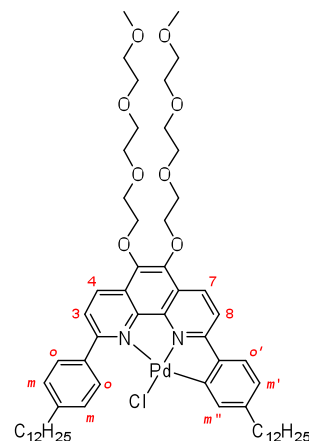

**Synthesis of amphiphilic NNC pincer palladium complex 2b**

**5,6-Bis(dodecyloxy)-1,10-phenanthroline (7).**

Under a nitrogen atmosphere, to a mixture of 1,10-phenanthroline-5,6-diol (**3**) (1.73 g, 8.20 mmol) and sodium hydride (716.0 mg, 17.9 mmol, 60% oil) was added anhydrous DMF (70 mL) at 0 °C. After being stirred at 25 °C for 2.5 h, 1-bromododecane (4.46 g, 17.9 mmol) was slowly added. The reaction mixture was stirred at 80 °C for 15 h and quenched with water (100 mL). The resulting mixture was extracted with dichloromethane (20 mL, 3 times). The combined organic layer was washed with water (20 mL) and brine (20 mL), and dried over  $\text{Na}_2\text{SO}_4$ . After removal of the solvent, the resulting residue was chromatographed on aluminium oxide (eluent 0–5% MeOH/EtOAc) to give **7** (3.2 g, 5.83 mmol, 72% yield) as brown solids. Mp. 54–55 °C.  $^1\text{H-NMR}$  (500 MHz,  $\text{CDCl}_3$ ):  $\delta$  9.11 (dd,  $J$  = 1.8, 4.3 Hz, 2H, phen 2,9-H), 8.56 (dd,  $J$  = 1.8, 8.2 Hz, 2H, phen 4,7-H), 7.63 (dd,  $J$  = 4.3, 8.2 Hz, 2H, phen 3,8-H), 4.24 (t,  $J$  = 6.7 Hz, 4H,  $-\text{OCH}_2\text{C}_{11}\text{H}_{23}$ ), 1.87–1.92 (m, 4H,  $-\text{OCH}_2\text{CH}_2(\text{CH}_2)_9\text{CH}_3$ ), 1.52–1.61 (m, 4H,  $-\text{OCH}_2\text{CH}_2(\text{CH}_2)_9\text{CH}_3$ ), 1.27–1.42 (m, 32H,  $-\text{OCH}_2\text{CH}_2(\text{CH}_2)_9\text{CH}_3$ ), 0.88 (t,  $J$  = 7.0 Hz, 3H,  $-\text{O}(\text{CH}_2)_{11}\text{CH}_3$ ).  $^{13}\text{C-NMR}$  (125 MHz,  $\text{CDCl}_3$ ):  $\delta$  149.06, 144.26, 142.20, 130.30, 126.30, 122.84, 73.92, 31.88, 30.35, 29.64, 29.61, 29.60, 29.59, 29.46, 29.32,

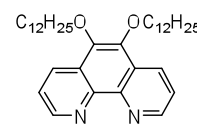

26.16, 22.65, 14.07. IR (ATR): 2915, 2849, 1613, 1463, 1427, 1398, 1322, 1110, 1075, 1065, 1025, 804, 740, 720  $\text{cm}^{-1}$ . ESI-MS  $m/z$  571 ( $[\text{M}+\text{Na}]^+$ ), 549 ( $[\text{M}+\text{H}]^+$ ). HR-ESI-MS calcd for  $\text{C}_{36}\text{H}_{58}\text{N}_2\text{O}_2$   $m/z$  549.4420, found 549.44241.

### 5,6-Bis(dodecyloxy)-2-[4-[2-[2-(2-methoxyethoxy)ethoxy]ethoxy]ethoxy]phenyl]-1,10-phenanthroline (**8**).

Under a nitrogen atmosphere, 1.16 mL (1.97 mmol) of 1.7 M *n*-BuLi in hexane was slowly added to a degassed solution of *p*-bromo-2-[2-{2-(2-methoxyethoxy)ethoxy}ethoxy]benzene (628.8 mg, 1.97 mmol) in anhydrous diethyl ether (10 mL) at  $-10\text{ }^{\circ}\text{C}$ . After being stirred at  $0\text{ }^{\circ}\text{C}$  for 1 h, to the solution was added dropwise a degassed solution of **7** (900 mg, 1.64 mmol) in anhydrous toluene (10 mL). The reaction mixture was stirred at  $0\text{ }^{\circ}\text{C}$  for 30 min and quenched with water (5 mL). The resulting mixture was extracted with dichloromethane (20 mL, 3 times). The combined organic layer was dried over  $\text{Na}_2\text{SO}_4$  and concentrated under reduced pressure. The resulting residue was dissolved in dichloromethane (40 mL) and activated  $\text{MnO}_2$  (Merck, catalog No. 8.05958.0100, 2.0 g, 23.0 mmol) was added.

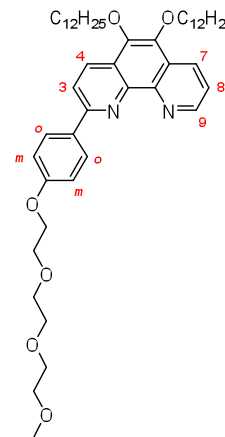

After being stirred at  $25\text{ }^{\circ}\text{C}$  for 1 h, the reaction mixture was filtered through Celite and eluted with dichloromethane. The filtrate was concentrated under reduced pressure. The resulting residue was chromatographed on silica gel (eluent 70-100% EtOAc/hexane) to give **8** (745.3 mg, 0.920 mmol, 58% yield) as brown solids. Mp.  $38\text{--}39\text{ }^{\circ}\text{C}$ .  $^1\text{H}$ -NMR (500 MHz,  $\text{CDCl}_3$ ):  $\delta$  9.14 (dd,  $J = 1.6, 4.1\text{ Hz}$ , 1H, phen 9-H), 8.58 (d,  $J = 8.8\text{ Hz}$ , 1H, phen 4-H), 8.57 (dd,  $J = 1.6, 8.2\text{ Hz}$ , 1H, phen 7-H), 8.30 (d,  $J = 8.8\text{ Hz}$ , 2H, *o*-H), 8.05 (d,  $J = 8.8\text{ Hz}$ , 1H, phen 3-H), 7.62 (dd,  $J = 4.1, 8.2\text{ Hz}$ , 1H, phen 8-H), 7.07 (d,  $J = 8.8\text{ Hz}$ , 2H, *m*-H), 4.22–4.27 (m, 6H,  $-\text{OCH}_2\text{C}_{11}\text{H}_{23}$ ,  $-\text{OC}_2\text{H}_4\text{O}-$ ), 3.90–3.92 (m, 2H,  $-\text{OC}_2\text{H}_4\text{O}-$ ), 3.77–3.78 (m, 2H,  $-\text{OC}_2\text{H}_4\text{O}-$ ), 3.67–3.72 (m, 4H,  $-\text{OC}_2\text{H}_4\text{O}-$ ), 3.56–3.58 (m, 2H,  $-\text{OC}_2\text{H}_4\text{O}-$ ), 3.11 (s, 3H,  $-\text{O}(\text{C}_2\text{H}_4\text{O})_3\text{CH}_3$ ), 1.87–1.94 (m, 4H,  $-\text{OCH}_2\text{CH}_2(\text{CH}_2)_9\text{CH}_3$ ), 1.53–1.60 (m, 4H,  $-\text{OCH}_2\text{CH}_2(\text{CH}_2)_9\text{CH}_3$ ), 1.27–1.40 (m, 32H,  $-\text{OCH}_2\text{CH}_2(\text{CH}_2)_9\text{CH}_3$ ), 0.88 (t,  $J = 7.0\text{ Hz}$ , 3H,  $-\text{O}(\text{CH}_2)_{11}\text{CH}_3$ ).  $^{13}\text{C}$ -NMR (125 MHz,  $\text{CDCl}_3$ ):  $\delta$  159.87, 155.84, 148.93, 144.26, 143.98, 142.37, 141.59, 132.30, 131.03, 130.30, 129.02, 126.56, 124.59, 122.55, 119.78, 114.71, 73.85, 71.85, 70.79, 70.58, 70.49, 69.65, 67.40, 58.93, 31.83, 30.33, 29.60, 29.55, 29.42, 29.28, 26.13, 22.60, 14.03. IR (ATR): 2922, 2852, 1611, 1453, 1382, 1324, 1250, 1174, 1110, 1083, 1066, 1026, 830, 820, 764, 722  $\text{cm}^{-1}$ . ESI-MS  $m/z$  810 ( $[\text{M}+\text{Na}]^+$ ). Anal. Calcd for  $\text{C}_{49}\text{H}_{74}\text{N}_2\text{O}_6\cdot\text{H}_2\text{O}$ : C, 73.10; H, 9.51; N, 3.48; Found: C, 73.46; H, 9.53; N, 3.37.

### 5,6-Bis(dodecyloxy)-2,9-bis[4-[2-[2-(2-methoxyethoxy)ethoxy]ethoxy]phenyl]-1,10-phenanthroline (**9**).

Under a nitrogen atmosphere, 0.30 mL (0.56 mmol) of 1.9 M *n*-BuLi in hexane was slowly added to a degassed solution of *p*-bromo(2-(2-(2-methoxyethoxy)ethoxy)ethoxy)benzene (178.7 mg, 0.560 mmol) in anhydrous THF (6 mL) at -78 °C. After being stirred at -78 °C for 1.5 h, to the solution was added dropwise a degassed solution of **8** (220.0 mg, 0.280 mmol) in anhydrous THF (1 mL). The reaction mixture was stirred at -78 °C for 1 h and quenched with water (1 mL). The resulting mixture was extracted with dichloromethane (10 mL, 3 times). The combined organic layer was dried over Na<sub>2</sub>SO<sub>4</sub> and concentrated under reduced pressure. The resulting residue was dissolved in dichloromethane (20 mL) and activated MnO<sub>2</sub> (Merck, catalog No. 8.05958.0100, 1.0 g, 11.5 mmol) was added. After being stirred at 25 °C for 11 h, the reaction mixture was filtered through Celite and eluted with dichloromethane. The filtrate was concentrated under reduced pressure. The resulting residue was chromatographed on silica gel (eluent 5% acetone/CH<sub>2</sub>Cl<sub>2</sub>) to give **9** (78.8 mg, 0.0769 mmol, 27% yield) as yellow solids. Mp. 40-41 °C. <sup>1</sup>H-NMR (500 MHz, CDCl<sub>3</sub>): δ 8.57 (d, *J* = 8.5 Hz, 2H, phen 4,7-H), 8.40 (d, *J* = 9.3 Hz, 4H, *o*-H), 8.07 (d, *J* = 8.5 Hz, 2H, phen 3,8-H), 7.12 (d, *J* = 9.3 Hz, 4H, *m*-H), 4.24–4.27 (m, 8H, -OCH<sub>2</sub>C<sub>11</sub>H<sub>23</sub>, -OC<sub>2</sub>H<sub>4</sub>O-), 3.92–3.94 (m, 4H, -OC<sub>2</sub>H<sub>4</sub>O-), 3.78–3.80 (m, 4H, -OC<sub>2</sub>H<sub>4</sub>O-), 3.68–3.73 (m, 8H, -OC<sub>2</sub>H<sub>4</sub>O-), 3.57–3.58 (m, 4H, -OC<sub>2</sub>H<sub>4</sub>O-), 3.39 (s, 6H, -O(C<sub>2</sub>H<sub>4</sub>O)<sub>3</sub>CH<sub>3</sub>), 1.91 (t, *J* = 7.5 Hz, -OCH<sub>2</sub>CH<sub>2</sub>(CH<sub>2</sub>)<sub>9</sub>CH<sub>3</sub>), 1.54–1.60 (m, 4H, -OCH<sub>2</sub>CH<sub>2</sub>(CH<sub>2</sub>)<sub>9</sub>CH<sub>3</sub>), 1.27–1.44 (m, 32H, -OCH<sub>2</sub>CH<sub>2</sub>(CH<sub>2</sub>)<sub>9</sub>CH<sub>3</sub>), 0.88 (t, *J* = 7.0 Hz, 6H, -O(CH<sub>2</sub>)<sub>11</sub>CH<sub>3</sub>). <sup>13</sup>C-NMR (125 MHz, CDCl<sub>3</sub>): δ 159.90, 155.13, 143.98, 141.90, 132.26, 131.09, 128.73, 124.84, 119.16, 114.77, 73.86, 71.87, 70.82, 70.61, 70.51, 69.69, 67.43, 58.97, 31.86, 30.37, 29.63, 29.60, 29.58, 29.46, 29.30, 26.17, 22.62, 14.06. IR (ATR): 2920, 2850, 1610, 1572, 1487, 1329, 1251, 1185, 1129, 1111, 1078, 950, 826, 771, 721 cm<sup>-1</sup>. ESI-MS *m/z* 1048 ([M+Na]<sup>+</sup>). Anal. Calcd for C<sub>62</sub>H<sub>92</sub>N<sub>2</sub>O<sub>10</sub>·H<sub>2</sub>O: C, 71.37; H, 9.08; N, 2.68; Found: C, 71.58; H, 9.08; N, 2.65.

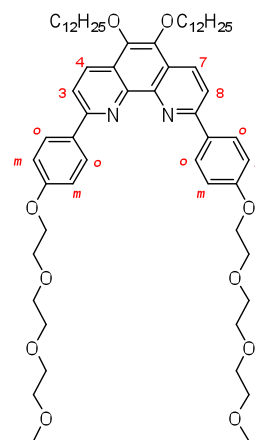

### Chloro-[2-[5,6-bis(dodecyloxy)-9-{4-(2-(2-(2-methoxyethoxy)ethoxy)ethoxy)phenyl]-1,10-phenanthroline-2-yl]-5-(2-(2-(2-methoxyethoxy)ethoxy)ethoxy)phenyl]palladium (**2b**).

To a solution of **9** (20.5 mg, 0.0191 mmol) in methanol (1.0 mL) was added PdCl<sub>2</sub>(MeCN)<sub>2</sub> (5.2 mg, 0.0200 mmol), and the reaction mixture was stirred at 50 °C for 6 h. After removal of the solvent, the residue was washed with hexane to afford **2b** (20.2 mg, 0.0173 mmol, 87%) as yellow solids. Mp. 70-71 °C. <sup>1</sup>H-NMR (396 MHz, CDCl<sub>3</sub>) δ 8.55 (d, *J* = 8.6 Hz, 1H, phen 4-H), 8.48 (d, *J* = 8.6 Hz, 1H, phen 7-H), 7.83 (d, *J* = 8.6 Hz, 1H, phen 8-H), 7.81 (d, *J* = 8.5 Hz, 2H, *o*-H), 7.71 (d, *J* = 8.6 Hz, 1H, phen 3-H), 7.51 (d, *J* = 2.4 Hz, 1H, *m*''-H), 7.36 (d, *J* = 8.6 Hz, 1H, *o*'-H), 7.08 (d, *J* = 8.5 Hz, 2H, *m*-H), 6.67 (dd, *J* = 2.4, 8.6 Hz, 1H, *m*'-H), 4.29–4.20 (m, 8H, -OCH<sub>2</sub>C<sub>11</sub>H<sub>23</sub>, -OC<sub>2</sub>H<sub>4</sub>O-), 3.92–3.65 (m, 16H, -OC<sub>2</sub>H<sub>4</sub>O-), 3.60–3.55 (m, 4H, -OC<sub>2</sub>H<sub>4</sub>O-), 3.40 (s, 3H, -OCH<sub>3</sub>), 3.38

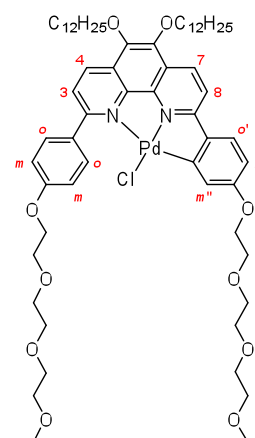

(s, 3H, -OCH<sub>3</sub>), 1.93–1.86 (m, 4H, -OCH<sub>2</sub>CH<sub>2</sub>C<sub>10</sub>H<sub>21</sub>), 1.58–1.51 (m, 4H, -O(CH<sub>2</sub>)<sub>2</sub>CH<sub>2</sub>C<sub>9</sub>H<sub>19</sub>), 1.42–1.27 (m, 32H, -O(CH<sub>2</sub>)<sub>3</sub>(CH<sub>2</sub>)<sub>8</sub>CH<sub>3</sub>), 0.90–0.87 (m, 6H, -OC<sub>11</sub>H<sub>22</sub>CH<sub>3</sub>). <sup>13</sup>C-NMR (100 MHz, CDCl<sub>3</sub>) δ 161.88, 161.01, 160.26, 159.25, 153.27, 144.17, 142.65, 142.13, 139.82, 132.05, 131.83, 131.33, 130.88, 126.75, 125.87, 125.27, 123.73, 121.34, 117.78, 114.38, 112.71, 71.89, 71.88, 70.81, 70.70, 70.61, 70.57, 70.52, 70.51, 69.63, 69.59, 67.40, 67.30, 59.02, 31.88, 30.28, 29.64, 29.62, 29.59, 29.43, 29.33, 26.11, 22.65, 14.10. IR (ATR): 2922, 2852, 1613, 1577, 1449, 1421, 1337, 1245, 1129, 1102, 1082, 1060, 1044, 950, 850, 830 cm<sup>-1</sup>. ESI-MS *m/z* 1130 ([M-Cl]<sup>+</sup>). Anal. Calcd for C<sub>62</sub>H<sub>91</sub>ClN<sub>2</sub>O<sub>10</sub>Pd·H<sub>2</sub>O: C, 62.88; H, 7.92; N, 2.37%. Found: C, 63.05; H, 7.75; N, 2.41%.

## Preparation of vesicles **2a<sub>vscf</sub>** and **2b<sub>vscf</sub>**

### Experimental procedure for the preparation of vesicles **2a<sub>vscf</sub>**

A chloroform solution of **2a** (0.1 mL, 10 mg/mL) was charged in a 4 mL vial equipped with a screw cap. After evaporation of the chloroform, a thin film of **2a** was formed on the inner glass surface of the vial. Then, 1 mL of Millipore water was added to the vial followed by heating the resulting mixture at 60 °C for 4 h without stirring. After standing at 25 °C for overnight, the resulting mixture was sonicated for 10 min to generate a yellow suspension of vesicles **2a<sub>vscf</sub>**. The suspension was characterized by DLS and microscopic analyses (vide infra).

### Experimental procedure for the preparation of vesicles **2b<sub>vscf</sub>**

A chloroform solution of **2b** (0.1 mL, 10 mg/mL) was charged in a 4 mL vial equipped with a screw cap. After evaporation of the chloroform, a thin film of **2b** was formed on the inner glass surface of the vial. Then, 1 mL of Millipore water was added to the vial followed by heating the resulting mixture at 80 °C for 12 h without stirring. After standing at 25 °C for overnight, the resulting mixture was sonicated for 10 min to generate a yellow suspension of vesicles **2b<sub>vscf</sub>**. The suspension was characterized by DLS and microscopic analyses (vide infra).

### Dynamic light scattering (DLS) analysis

The suspension of vesicle **2a<sub>vscf</sub>** or **2b<sub>vscf</sub>** was placed in a glass tube. The DLS measurement was performed with 200 times repetition of signal scans. Particle sizes are estimated using the Marquardt method of data analysis.

### Transmission electron microscopy (TEM) analysis

Samples for TEM analysis were prepared by the following method: suspensions of vesicle **2a<sub>vscf</sub>** and **2b<sub>vscf</sub>** (**2a** or **2b**/water = 1 mg/1 mL) were centrifuged (1000 rpm, 15 min) to give a precipitate and a supernatant. After removal of the supernatant by decantation, the resulting aqueous suspensions of the precipitate were diluted with 0.4 mL of water. The suspensions were dropped onto a copper grid covered with a carbon membrane and then air-dried. The obtained samples were measured with TEM.



### **Atomic Force Microscopy (AFM) analysis**

Samples for AFM analysis were prepared by the following method: suspensions of vesicle **2a<sub>vscf</sub>** and **2b<sub>vscf</sub>** (**2a** or **2b**/water = 1 mg/1 mL) were centrifuged (1000 rpm, 15 min) to give a precipitate and a supernatant. After removal of the supernatant by decantation, the resulting aqueous suspensions of the precipitate were diluted with 0.4 mL of water. The suspensions were dropped onto a silicon wafer (Nilaco, P, Low, <0.02  $\Omega$ cm) and then air-dried. AFM analyses were performed under air in a conventional tapping mode.

### **Fluorescence microscopy and Confocal laser scanning microscopy (CLSM) analyses (diffusion of a hydrophobic compound to vesicles with fluorescein)**

Samples for fluorescence microscopy and CLSM were prepared by the following method: to suspensions of **2a<sub>vscf</sub>** and **2b<sub>vscf</sub>** in water (**2a**/water = 2 mg/1 mL, **2b**/water = 0.5 mg/1 mL) were added 1  $\mu$ L of an ethanol solution of fluorescein (1.5 mM) to give stained **2a<sub>vscf</sub>**/fluorescein and **2b<sub>vscf</sub>**/fluorescein, respectively. The stained **2a<sub>vscf</sub>** and **2b<sub>vscf</sub>** were cast (1 drop) onto microscope slides, and then covered with cover glasses. The edges of the cover glasses were sealed with glue to prevent drying. The resulting slides were subjected to fluorescence microscopy and CLSM.

### **Fluorescence microscopy and Confocal laser scanning microscopy (CLSM) analyses (diffusion of a hydrophobic compound to vesicles with Nile Red)**

To the suspensions of **2a<sub>vscf</sub>**/fluorescein and **2b<sub>vscf</sub>**/fluorescein was added 3  $\mu$ L of a  $\text{CHCl}_3$  solution of Nile Red (4.5 mM). The suspension was centrifuged at 2500 rpm for 10 min to give a supernatant and a precipitate. The precipitate was removed by decantation. The precipitate was washed via centrifugation-decantation with Millipore water (**2a<sub>vscf</sub>**: 0.3 mL x 3 times, **2b<sub>vscf</sub>**: 0.6 mL x 3 times) to give **2a<sub>vscf</sub>**/Nile Red and **2b<sub>vscf</sub>**/Nile Red, respectively. The stained **2a<sub>vscf</sub>** and **2b<sub>vscf</sub>** were cast (1 drop) onto microscope slides, and then covered with cover glasses. The edges of the cover glasses were sealed with glue to prevent drying. The resulting slides were subjected to fluorescence microscopy.

### Additional TEM images

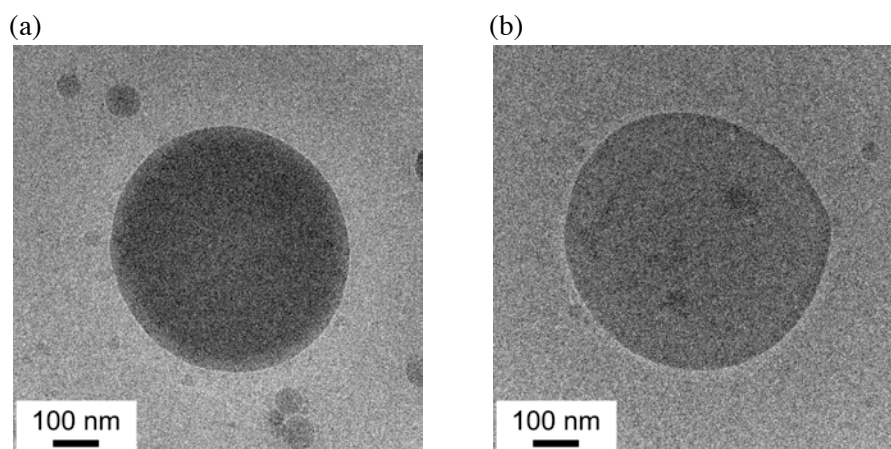

**Figure S1.** TEM images of vesicles **2a<sub>vscI</sub>** (a) after heating at 80 °C for 1 h in water, (b) after heating at 100 °C for 1 h in water.

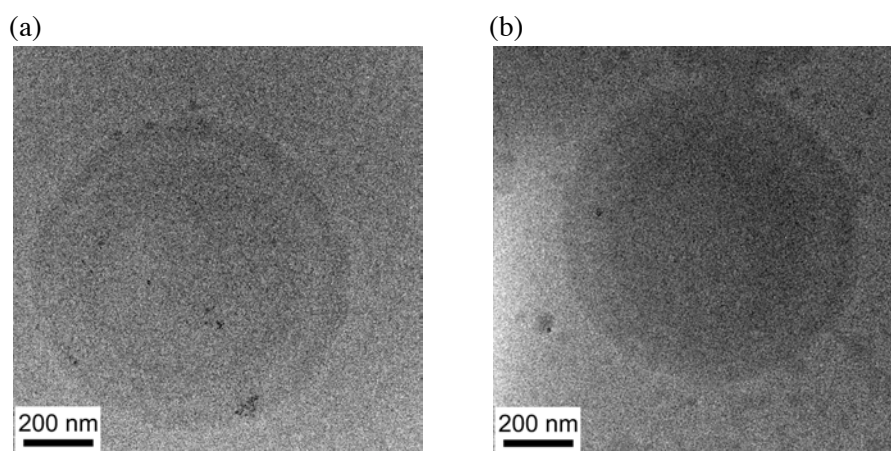

**Figure S2.** TEM images of vesicles **2b<sub>vscI</sub>** (a) after heating at 80 °C for 1 h, in water (b) after heating at 100 °C for 1 h in water.

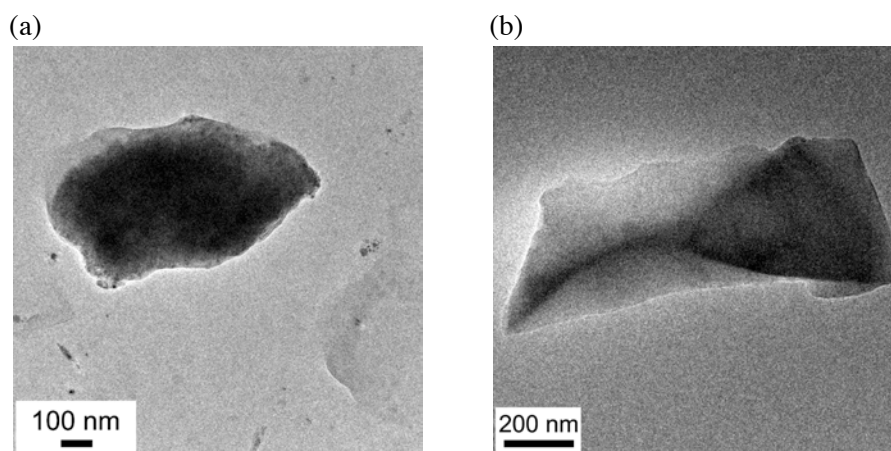

**Figure S3.** TEM images of amorphous complexes **2a<sub>amps</sub>** (a) and **2b<sub>amps</sub>** (b).

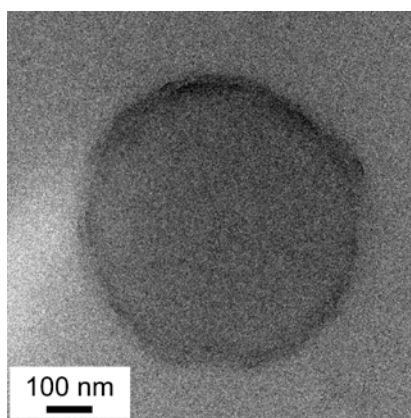

**Figure S4.** TEM images of vesicles **2a<sub>vscI</sub>** after the reaction of iodobenzene (**10a**) with ethynylbenzene (**11a**) in water at 40 °C for 1 h.

## Typical procedure and characterization of the products for the arylation of terminal alkynes

### Typical procedure for the arylation of terminal alkynes using **2a<sub>vscI</sub>**

To a vial equipped with a screw cap, 1 mL aqueous suspension of **2a<sub>vscI</sub>** (1.0 mg,  $8.5 \times 10^{-4}$  mmol), triethylamine (10.3 mg, 0.10 mmol), ethynylbenzene (**11a**) (7.0 mg, 0.068 mmol), and iodobenzene (**10a**) (6.9 mg, 0.034 mmol) were added. The reaction mixture was agitated with shaking at 40 °C for 1 h and allowed to cool to 25 °C. The reaction mixture was extracted with *tert*-butyl-methyl ether (1.0 mL, 5 times). The combined organic layer was dried over Na<sub>2</sub>SO<sub>4</sub> and concentrated under reduced pressure. The resulting residue was chromatographed on silica gel (eluent: hexane) to give 1,1'-ethyne-1,2-diylidibenzene **12a** (11.5 mg, 0.063 mmol, 92%) as white solids.

### 1,1'-ethyne-1,2-diylidibenzene (**12a**)<sup>5</sup> [CAS: 64666-02-0]

<sup>1</sup>H NMR (396 MHz, CDCl<sub>3</sub>) δ 7.55–7.52 (m, 4H, ArH), 7.37–7.33 (m, 6H, ArH). <sup>13</sup>C-NMR (100 MHz, CDCl<sub>3</sub>) δ 131.57, 128.31, 128.23, 123.22, 89.33. EI-MS *m/z* 178 (M<sup>+</sup>).

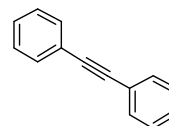

### 1-Phenyl-2-(*p*-trifluoromethylphenyl)acetylene (**12b**)<sup>5</sup> [CAS: 370-99-0]

<sup>1</sup>H NMR (396 MHz, CDCl<sub>3</sub>) δ 7.65–7.54 (m, 6H, ArH), 7.38–7.37 (m, 3H, ArH). <sup>13</sup>C-NMR (100 MHz, CDCl<sub>3</sub>) δ 131.76, 131.70, 129.84 (q, *J* = 32.7 Hz), 128.79, 128.42, 127.06, 125.23 (q, *J* = 3.5 Hz), 123.92 (q, *J* = 272.0 Hz), 122.51, 91.72, 87.94. EI-MS *m/z* 246 (M<sup>+</sup>).

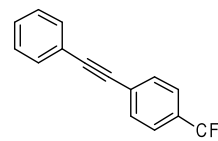

### 1-(*p*-Methoxyphenyl)-2-phenylacetylene (**12c**)<sup>5</sup> [CAS: 7380-78-1]

<sup>1</sup>H NMR (396 MHz, CDCl<sub>3</sub>) δ 7.52–7.46 (m, 4H, ArH), 7.36–7.30 (m, 3H, ArH), 6.88 (d, *J* = 8.7 Hz, 2H, ArH), 3.82 (s, 3H, -OCH<sub>3</sub>). <sup>13</sup>C-NMR (100 MHz, CDCl<sub>3</sub>) δ 159.56, 133.02, 131.42, 128.28, 127.91, 123.53, 115.31, 113.95, 89.33, 88.03, 55.27. EI-MS *m/z* 208 (M<sup>+</sup>).

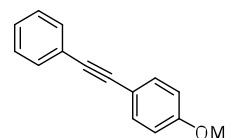

**1-Phenyl-2-(*m*-tolyl)acetylene (12d)**<sup>6</sup> [CAS: 14635-91-7]

<sup>1</sup>H NMR (396 MHz, CDCl<sub>3</sub>) δ 7.54–7.51 (m, 2H, ArH), 7.37–7.32 (m, 5H, ArH), 7.24 (t, *J* = 7.8 Hz, 1H, ArH), 7.14 (d, *J* = 7.8 Hz, 1H, ArH), 2.35 (s, 3H, -CH<sub>3</sub>). <sup>13</sup>C-NMR (100 MHz, CDCl<sub>3</sub>) δ 138.00, 132.17, 131.58, 129.15, 128.67, 128.31, 128.23, 128.15, 123.36, 123.04, 89.53, 89.00, 21.22. EI-MS *m/z* 192 (M<sup>+</sup>).

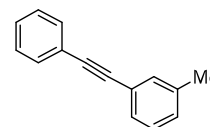

**1-Phenyl-2-(*o*-tolyl)acetylene (12e)**<sup>5</sup> [CAS: 14309-60-5]

<sup>1</sup>H NMR (396 MHz, CDCl<sub>3</sub>) δ 7.55–7.49 (m, 3H, ArH), 7.38–7.33 (m, 3H, ArH), 7.24–7.15 (m, 3H, ArH), 2.52 (s, 3H, -CH<sub>3</sub>). <sup>13</sup>C-NMR (100 MHz, CDCl<sub>3</sub>) δ 140.17, 131.80, 131.48, 129.44, 128.43, 128.33, 128.28, 128.16, 125.56, 123.50, 93.30, 88.29, 20.74. EI-MS *m/z* 192 (M<sup>+</sup>).

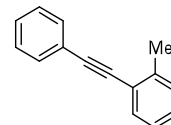

**1-(1-Naphthyl)-2-phenyl acetylene (12f)**<sup>5</sup> [CAS: 4044-57-9]

<sup>1</sup>H NMR (396 MHz, CDCl<sub>3</sub>) δ 8.45 (d, *J* = 9.1 Hz, 1H), 7.86 (t, *J* = 8.9 Hz, 2H), 7.77 (dd, *J* = 1.2, 7.2 Hz, 1H), 7.67–7.65 (m, 2H), 7.63–7.58 (m, 1H), 7.56–7.52 (m, 1H), 7.47 (dd, *J* = 7.2, 8.1 Hz, 1H), 7.43–7.36 (m, 3H). <sup>13</sup>C-NMR (100 MHz, CDCl<sub>3</sub>) δ 133.24, 133.18, 131.65, 130.43, 128.74, 128.41, 128.37, 128.29, 126.76, 126.41, 126.20, 125.26, 123.37, 120.86, 94.29, 87.50. EI-MS *m/z* 228 (M<sup>+</sup>).

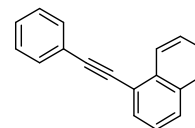

**1-Phenyl-2-(2-thienyl)acetylene (12g)**<sup>7</sup> [CAS: 4805-17-8]

<sup>1</sup>H NMR (396 MHz, CDCl<sub>3</sub>) δ 7.54–7.49 (m, 2H, ArH), 7.38–7.33 (m, 3H, ArH), 7.30–7.28 (m, 2H, ArH), 7.01 (dd, *J* = 3.6, 5.1 Hz, 1H, 4-thienyl-H). <sup>13</sup>C-NMR (100 MHz, CDCl<sub>3</sub>) δ 131.87, 131.39, 128.40, 128.35, 127.23, 127.08, 123.29, 122.89, 92.99, 82.57. EI-MS *m/z* 184 (M<sup>+</sup>).

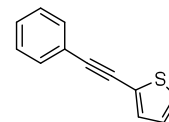

**(1-Cyclohexenylethynyl)benzene (12h)**<sup>7</sup> [CAS: 13456-84-3]

<sup>1</sup>H NMR (396 MHz, CDCl<sub>3</sub>) δ 7.43–7.40 (m, 2H, ArH), 7.32–7.25 (m, 3H, ArH), 6.23–6.20 (m, 1H, CH), 2.25–2.20 (m, 2H, -CH<sub>2</sub>-), 2.17–2.12 (m, 2H, -CH<sub>2</sub>-), 1.70–1.60 (m, 4H, -CH<sub>2</sub>-). <sup>13</sup>C-NMR (100 MHz, CDCl<sub>3</sub>) δ 135.18, 131.40, 128.19, 127.69, 123.69, 120.67, 91.21, 86.72, 29.19, 25.74, 22.32, 21.49. EI-MS *m/z* 182 (M<sup>+</sup>).

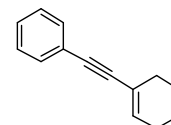

**1-Heptyn-1-yl-benzene**<sup>8</sup> [CAS: 14374-45-9]

<sup>1</sup>H NMR (396 MHz, CDCl<sub>3</sub>) δ 7.41–7.38 (m, 2H, ArH), 7.29–7.25 (m, 3H, ArH), 2.40 (t, *J* = 6.9 Hz, 2H), 1.63–1.54 (m, 2H), 1.49–1.32 (m, 4H), 0.92 (t, *J* = 6.9 Hz, 3H). <sup>13</sup>C-NMR (100 MHz, CDCl<sub>3</sub>) δ 135.53, 128.18, 127.48, 124.06, 90.50, 80.51, 31.15, 28.42, 22.26, 19.39, 14.03. EI-MS *m/z* 172 (M<sup>+</sup>).

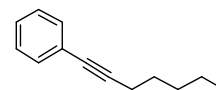

## References

- (1) J. Etteedgui, R. Neumann *J. Am. Chem. Soc.* **2009**, *131*, 4.
- (2) H. Maeda, Y. Ito, Y. Haketa, N. Eifuku, E. Lee, M. Lee, T. Hashishin, K. Kaneko *Chem. Eur. J.* **2009**, *15*, 3706.
- (3) M. Kuritani, S. Tashiro, M. Shionoya *Chem Asian. J.* **2013**, *8*, 1368.
- (4) Gaussian 09, Revision C.01, M. J. Frisch, G. W. Trucks, H. B. Schlegel, G. E. Scuseria, M. A. Robb, J. R. Cheeseman, G. Scalmani, V. Barone, B. Mennucci, G. A. Petersson, H. Nakatsuji, M. Caricato, X. Li, H. P. Hratchian, A. F. Izmaylov, J. Bloino, G. Zheng, J. L. Sonnenberg, M. Hada, M. Ehara, K. Toyota, R. Fukuda, J. Hasegawa, M. Ishida, T. Nakajima, Y. Honda, O. Kitao, H. Nakai, T. Vreven, J. A. Montgomery, Jr., J. E. Peralta, F. Ogliaro, M. Bearpark, J. J. Heyd, E. Brothers, K. N. Kudin, V. N. Staroverov, T. Keith, R. Kobayashi, J. Normand, K. Raghavachari, A. Rendell, J. C. Burant, S. S. Iyengar, J. Tomasi, M. Cossi, N. Rega, J. M. Millam, M. Klene, J. E. Knox, J. B. Cross, V. Bakken, C. Adamo, J. Jaramillo, R. Gomperts, R. E. Stratmann, O. Yazyev, A. J. Austin, R. Cammi, C. Pomelli, J. W. Ochterski, R. L. Martin, K. Morokuma, V. G. Zakrzewski, G. A. Voth, P. Salvador, J. J. Dannenberg, S. Dapprich, A. D. Daniels, O. Farkas, J. B. Foresman, J. V. Ortiz, J. Cioslowski, and D. J. Fox, Gaussian, Inc., Wallingford CT, 2010.
- (5) A. Ohtaka, T. Teratani, R. Fujii, K. Ikeshita, T. Kawashima, K. Tatsumi, O. Shimomura, R. Nomura *J. Org. Chem.* **2011**, *76*, 4052.
- (6) X. Li, F. Yang, Y. Wu. *J. Org. Chem.* **2013**, *78*, 4543.
- (7) S. Atobe, M. Sonoda, Y. Suzuki, H. Shinohara, T. Yamamoto, A. Ogawa *Chem. Lett.* **2011**, *40*, 925.
- (8) S. Leilei, W. Jia, N. Jiao *Tetrahedron Lett.* **2013**, *54*, 1951.

FS1-082 20120411

C:\Documents and Settings\ALPHA\ff\X\N\g\fb\v\UozumiG\sakurai\FS1 (001-200)\FS1-082\_20120411.als

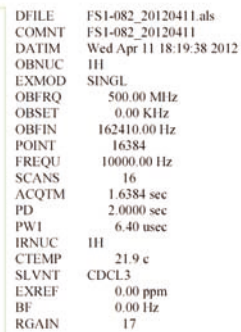

C:\Documents and Settings\ALPHA\ff\X\N\g\b\y\UozumiG\sakurai\F51 (001-200)\FS1-082\_20120411\_13C.als

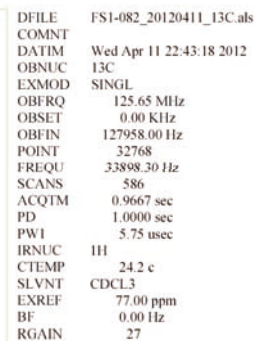

## 2-(4-Dodecylphenyl)-5,6-bis[2-[2-(2-methoxyethoxy)ethoxy]ethoxy]-1,10-phenanthroline (5)

single\_pulse

Z:\UOZUMI\_G\sakurai\phen2B(1)\_20130522\_proton-1-1.als

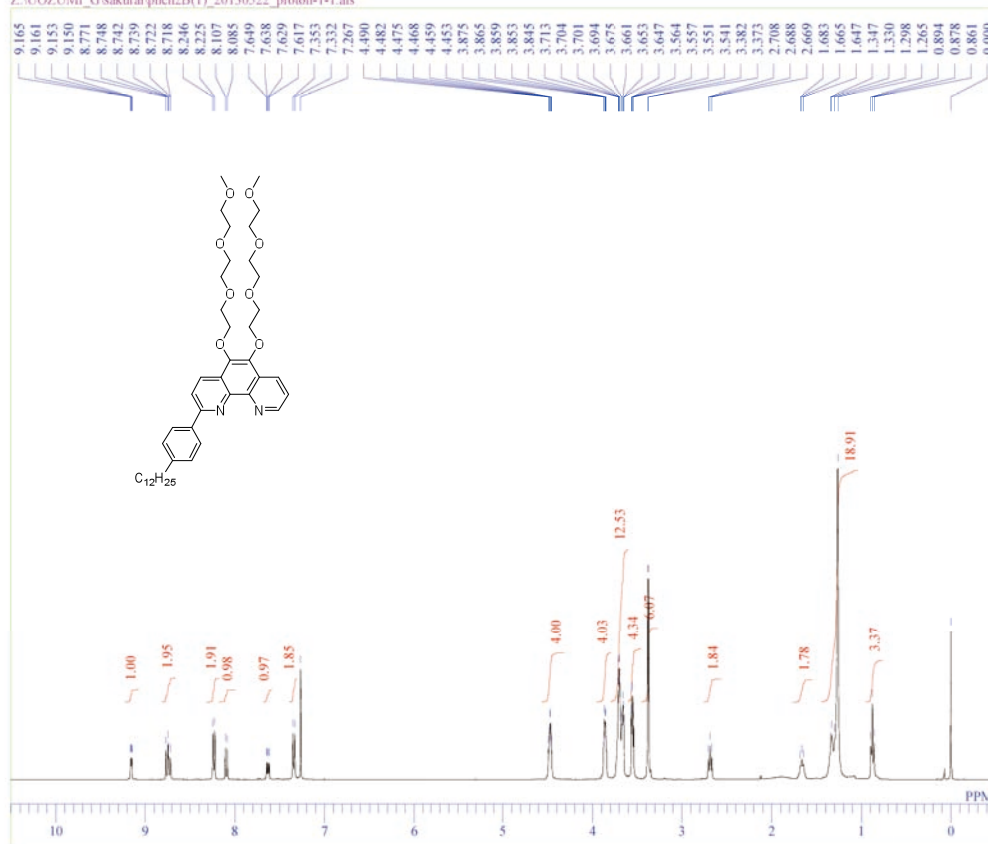

DFILE phen2B(1)\_20130522\_proton-1-1.als  
COMNT single\_pulse  
DATIM 2013-05-22 17:25:19  
OBNUC 1H  
EXMOD proton.jsp  
OBFREQ 395.88 MHz  
OBSET 6.28 KHz  
OBFIN 0.87 Hz  
POINT 13107  
FREQU 5938.24 Hz  
SCANS 16  
ACQTM 2.2073 sec  
PD 5.0000 sec  
PW1 3.12 usec  
IRNUC 1H  
CTEMP 19.3 c  
SLVNT CDCL3  
EXREF 0.00 ppm  
BF 1.00 Hz  
RGAIN 34

single pulse decoupled gated NOE

Z:\UOZUMI\_G\sakurai\FS1-138\_carbon-1-1.als

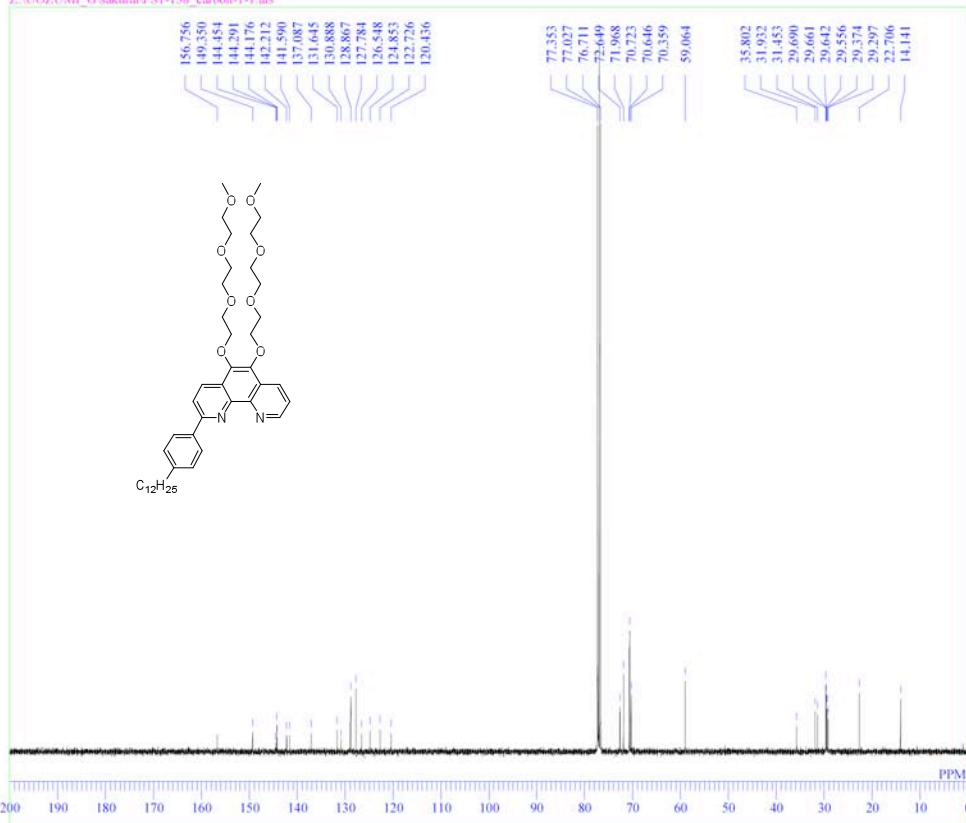

DFILE FS1-138\_carbon-1-1.als  
COMNT single pulse decoupled gated NOE  
DATIM 2013-08-01 19:29:41  
OBNUC 13C  
EXMOD carbon.jsp  
OBFREQ 99.55 MHz  
OBSET 5.13 KHz  
OBFIN 0.98 Hz  
POINT 26214  
FREQU 25000.00 Hz  
SCANS 2048  
ACQTM 1.0486 sec  
PD 2.0000 sec  
PW1 3.42 usec  
IRNUC 1H  
CTEMP 21.4 c  
SLVNT CDCL3  
EXREF 0.00 ppm  
BF 0.40 Hz  
RGAIN 60



# 2,9-Bis(4-dodecylphenyl)-5,6-bis[2-[2-(2-methoxyethoxy)ethoxy]ethoxy]-1,10-phenanthroline (6)

FS1-103\_20110412

C:\Documents and Settings\ALPHA\1\X\N\g\bf\U\ozumi\G\sakurai\FS1 (001-200)\FS1-103\_20110412.als

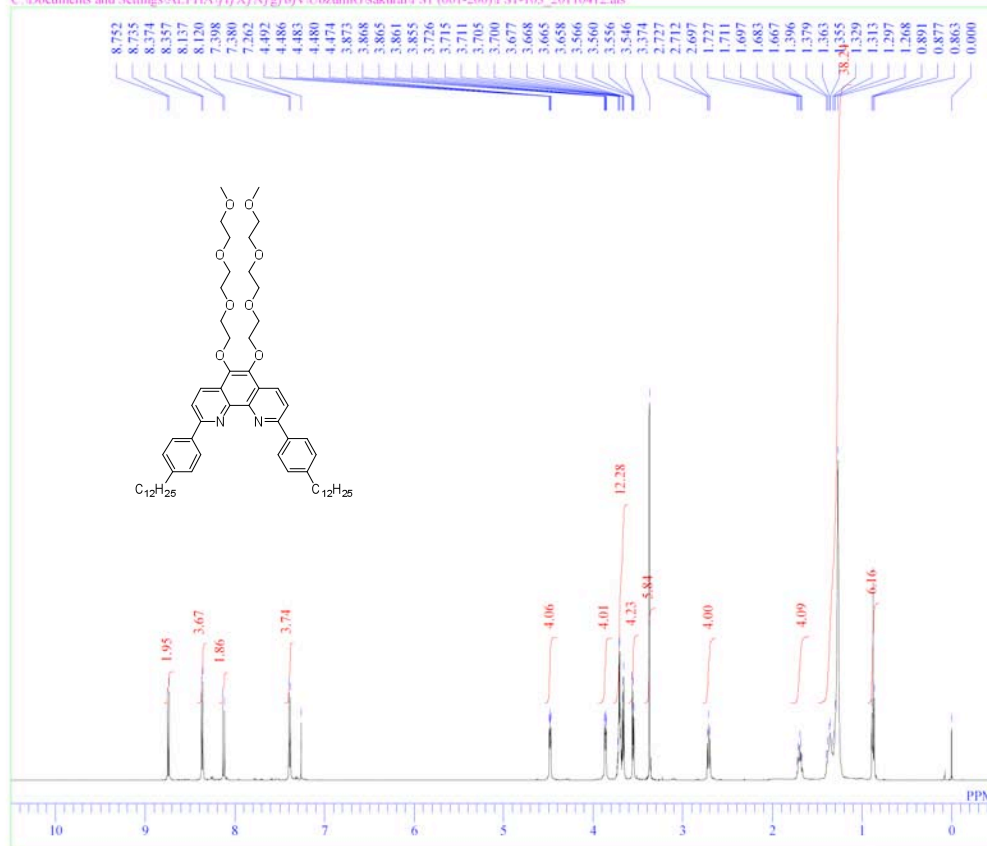

DFILE FS1-103\_20110412.als  
COMNT FS1-103\_20110412  
DATIM Thu Apr 12 10:27:00 2012  
OBNUC 1H  
EXMOD SINGL  
OBFREQ 500.00 MHz  
OBSET 0.00 KHz  
OBFIN 162410.00 Hz  
POINT 16384  
FREQU 100000.00 Hz  
SCANS 16  
ACQTM 1.6384 sec  
PD 2.0000 sec  
PW1 6.40 usec  
IRNUC 1H  
CTEMP 21.8 c  
SLVNT CDCL3  
EXREF 0.00 ppm  
BF 0.00 Hz  
RGAIN 13

FS1-117\_phenanthroline(purified)

C:\Documents and Settings\ALPHA\1\X\N\g\bf\U\ozumi\G\sakurai\FS1 (001-200)\FS1-117\_phenanthroline(purified).13C\_2.als

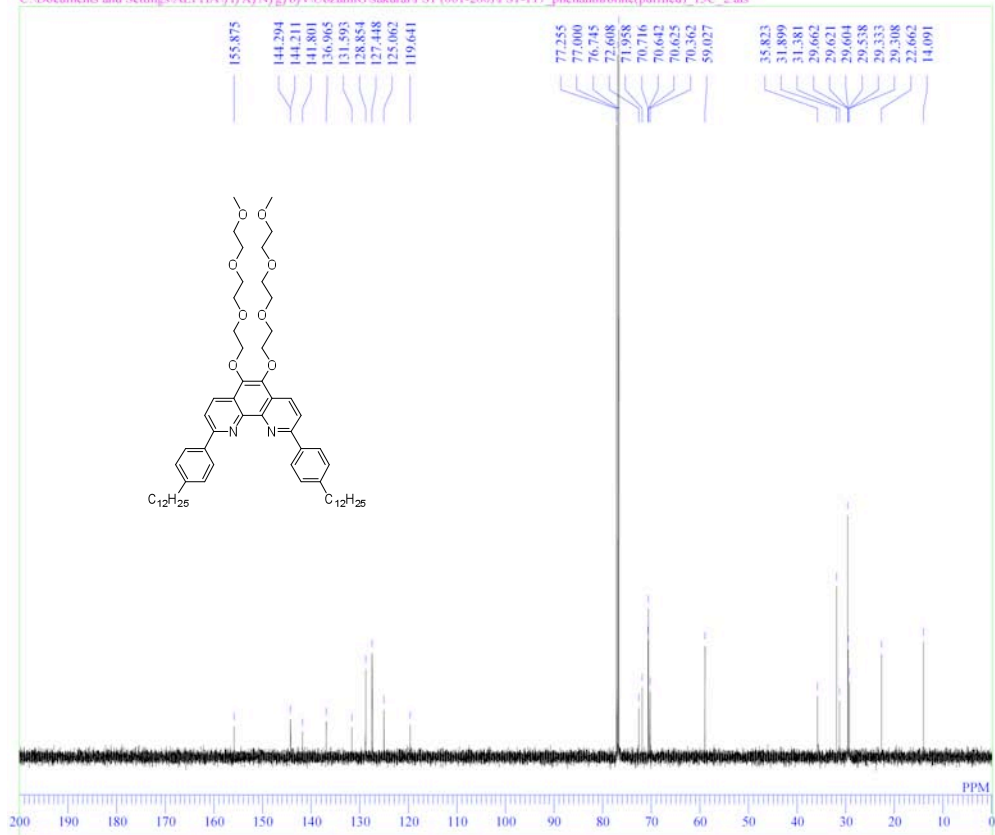

DFILE FS1-117\_phenanthroline(purified).13C\_2.als  
COMNT FS1-117\_phenanthroline(purified)  
DATIM Tue Jan 10 20:54:32 2012  
OBNUC 13C  
EXMOD SINGL  
OBFREQ 125.65 MHz  
OBSET 0.00 KHz  
OBFIN 127958.00 Hz  
POINT 32768  
FREQU 33898.30 Hz  
SCANS 1024  
ACQTM 0.9667 sec  
PD 1.0000 sec  
PW1 5.75 usec  
IRNUC 1H  
CTEMP 25.0 c  
SLVNT CDCL3  
EXREF 77.00 ppm  
BF 0.00 Hz  
RGAIN 27



**Chloro-[5-dodecyl-2-{9-(4-dodecylphenyl)-5,6-bis(2-(2-(2-methoxyethoxy)ethoxy)ethoxy)-1,10-phenanthrolin-2-yl}phenyl]palladium (2a)**

single\_pulse

Z:\UOZUMI\_G\sakurai\Pd-phen2b\_20130521\_proton-1-1.als

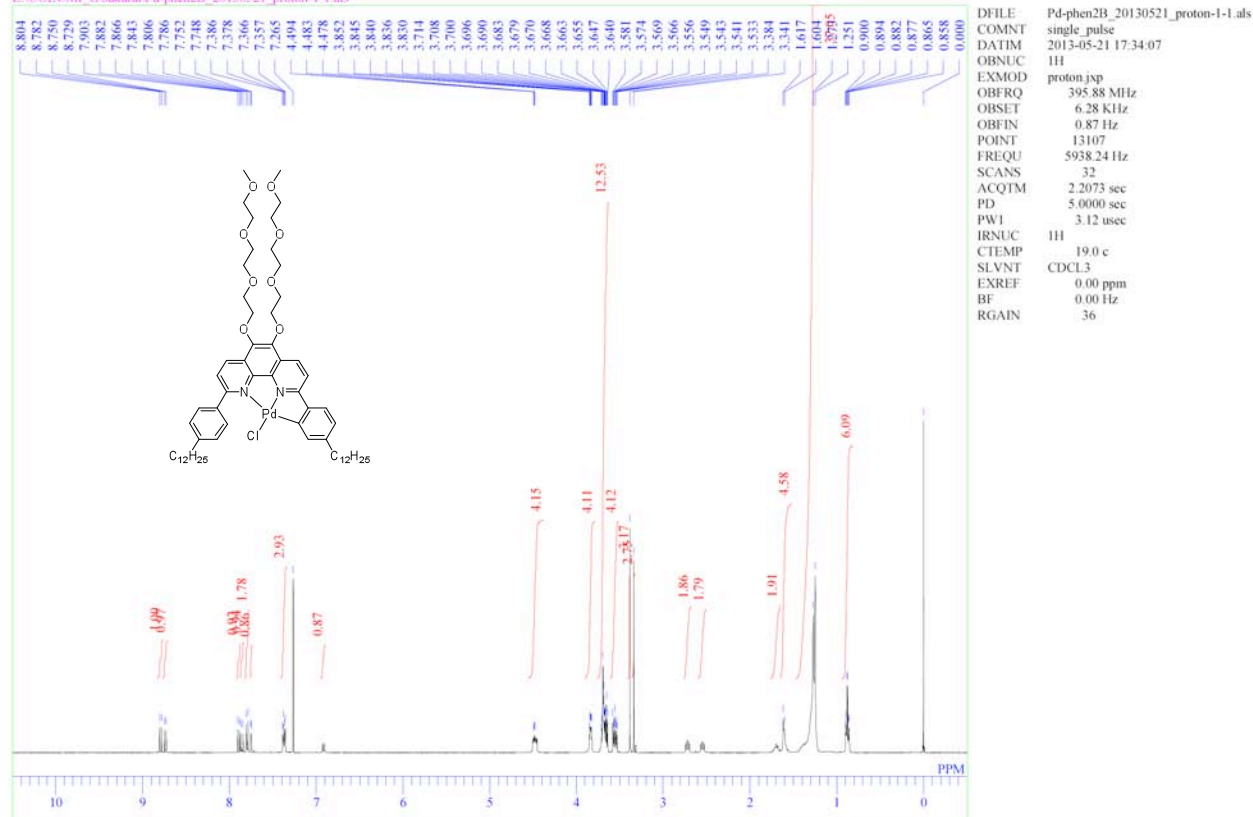

single pulse decoupled gated NOE

Z:\UOZUMI\_G\sakurai\Pd-phen2b\_13C\_Carbon-1-1.als

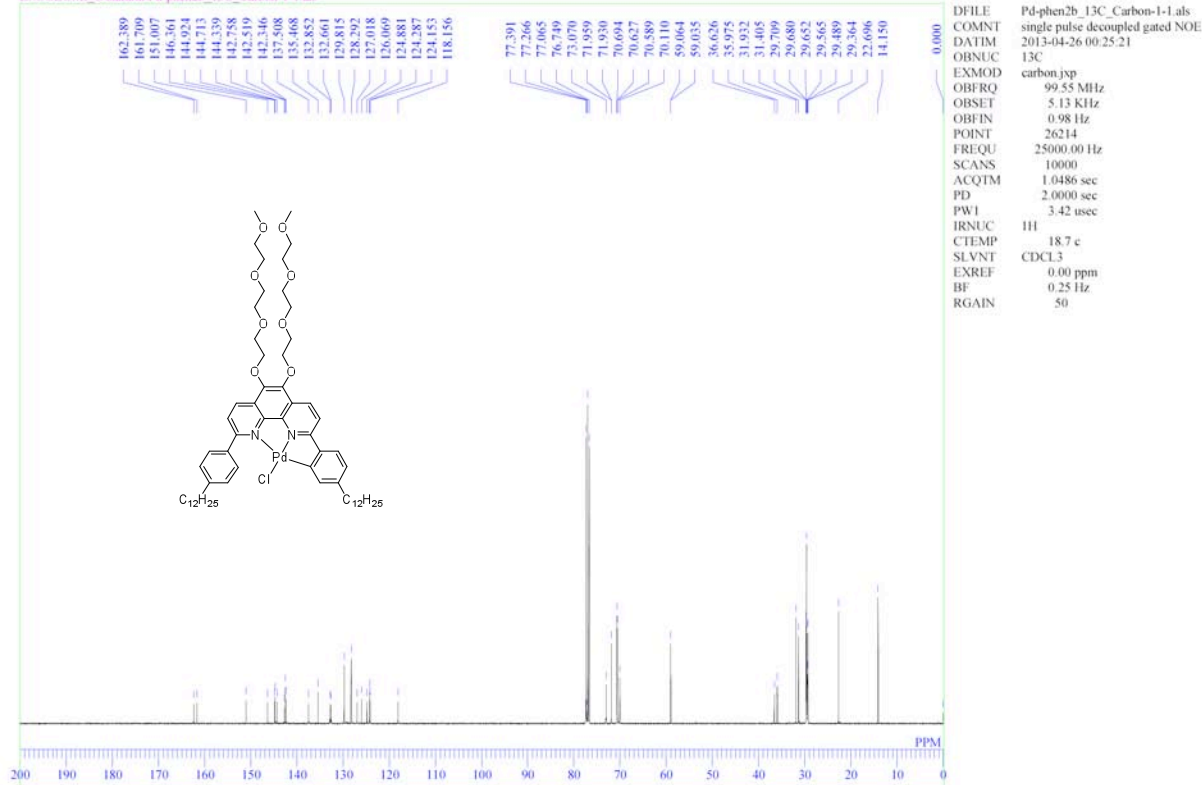

# 5,6-Bis(dodecyloxy)-1,10-phenanthroline (7)

FS2-133\_phen2b(0)

C:\Documents and Settings\ALPHA\ff\X\N\g\h\UozumiG\sakurai\FS2 (001-200)\FS2-133\_phen2b(0).als

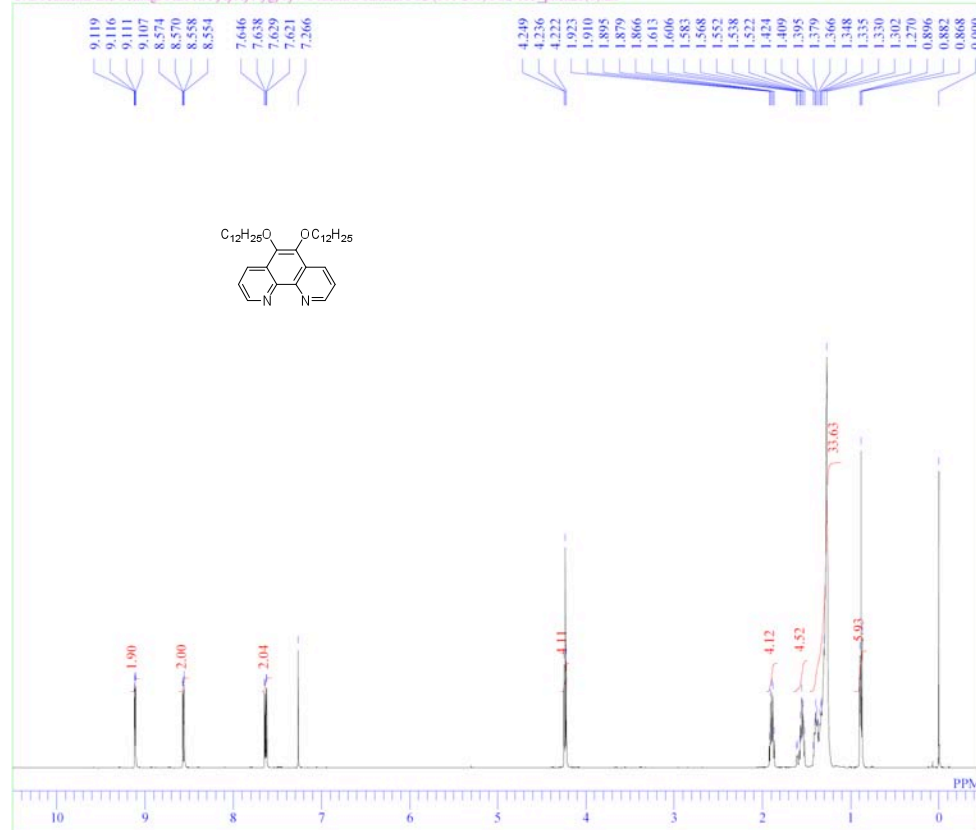

DFILE FS2-133\_phen2b(0).als  
COMNT FS2-133\_phen2b(0)  
DATIM Mon Oct 15 16:44:23 2012  
OBNUC 1H  
EXMOD SINGL  
OBFRQ 500.00 MHz  
OBSET 0.00 KHz  
OBFIN 162410.00 Hz  
POINT 16384  
FREQU 100000.00 Hz  
SCANS 16  
ACQTM 1.6384 sec  
PD 2.0000 sec  
PW1 6.40 usec  
IRNUC 1H  
CTEMP 21.0 c  
SLVNT CDCL3  
EXREF 0.00 ppm  
BF 0.00 Hz  
RGAIN 16

FS2-081\_13C

C:\Documents and Settings\ALPHA\ff\X\N\g\h\UozumiG\sakurai\FS2 (001-200)\FS2-081\_13C.als

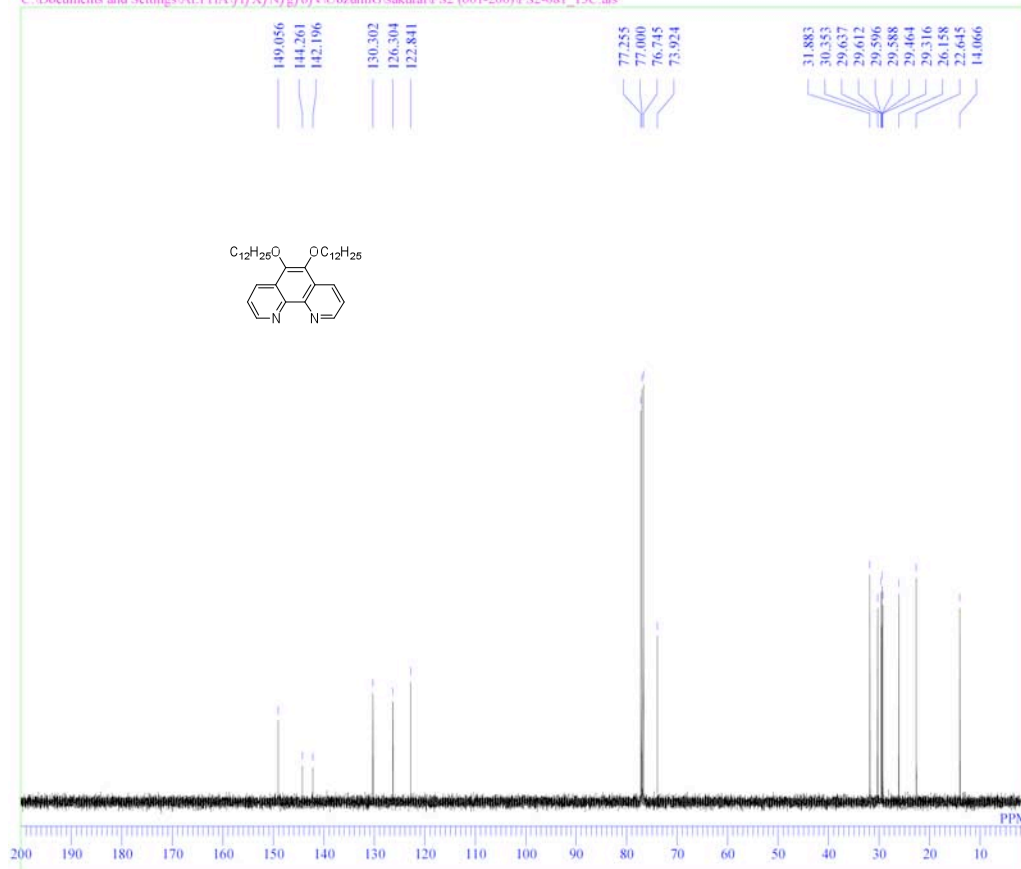

DFILE FS2-081\_13C.als  
COMNT FS2-081\_13C  
DATIM Tue Sep 11 21:33:17 2012  
OBNUC 13C  
EXMOD SINGL  
OBFRQ 125.65 MHz  
OBSET 0.00 KHz  
OBFIN 127958.00 Hz  
POINT 32768  
FREQU 33898.30 Hz  
SCANS 512  
ACQTM 0.9667 sec  
PD 1.0000 sec  
PW1 5.75 usec  
IRNUC 1H  
CTEMP 25.0 c  
SLVNT CDCL3  
EXREF 77.00 ppm  
BF 0.00 Hz  
RGAIN 26

# 5,6-Bis(dodecyloxy)-2-[4-[2-[2-(2-methoxyethoxy)ethoxy]ethoxy]phenyl]-1,10-phenanthroline (8)

FS2-105\_20120926

C:\Documents and Settings\ALPHA\ff\X\N\g\b\UozumiG\sakurai\FS2 (001-200)\FS2-105\_20120926.als

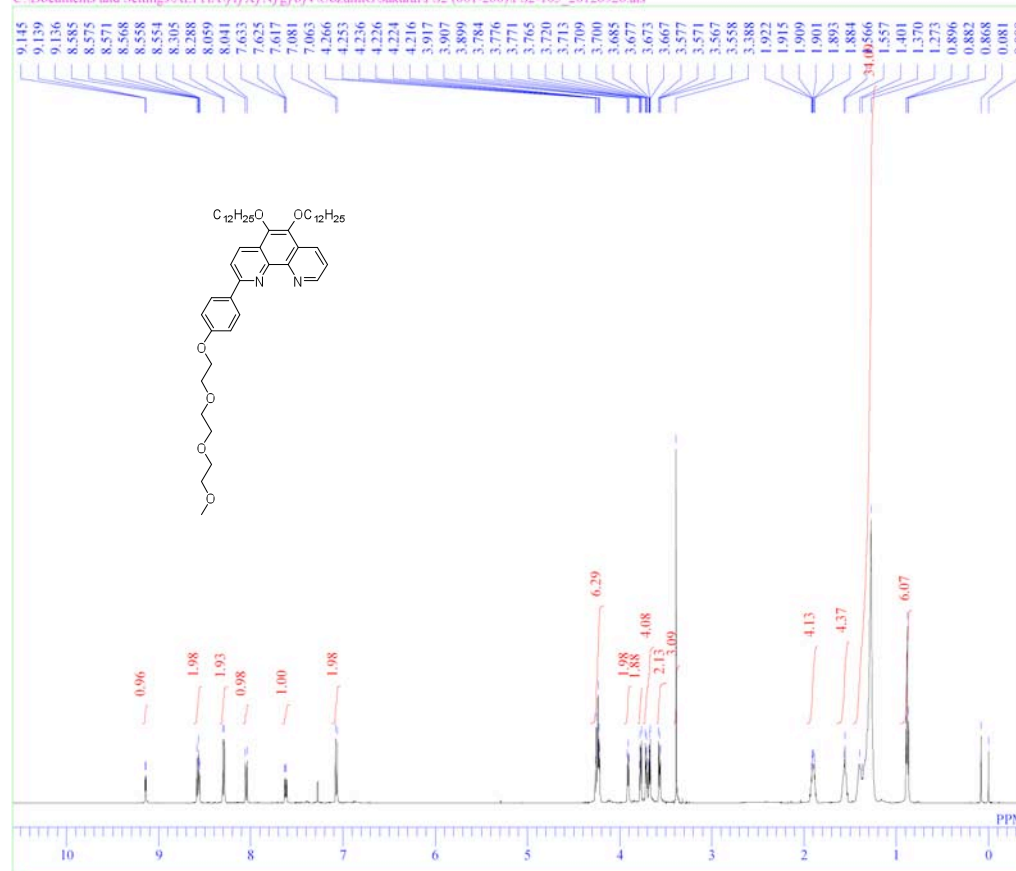

DFILE FS2-105\_20120926.als  
COMNT FS2-105\_20120926  
DATIM Wed Sep 26 11:21:06 2012  
OBNUC 1H  
EXMOD SINGL  
OBFRQ 500.00 MHz  
OBSET 0.00 KHz  
OBFIN 162410.00 Hz  
POINT 16384  
FREQU 10000.00 Hz  
SCANS 8  
ACQTM 1.6384 sec  
PD 2.0000 sec  
PW1 6.40 usec  
IRNUC 1H  
CTEMP 22.0 c  
SLVNT CDCL3  
EXREF 0.00 ppm  
BF 0.00 Hz  
RGAIN 12

FS2-099\_20120915\_13C

C:\Documents and Settings\ALPHA\ff\X\N\g\b\UozumiG\sakurai\FS2 (001-200)\FS2-099\_20120915\_13C.als

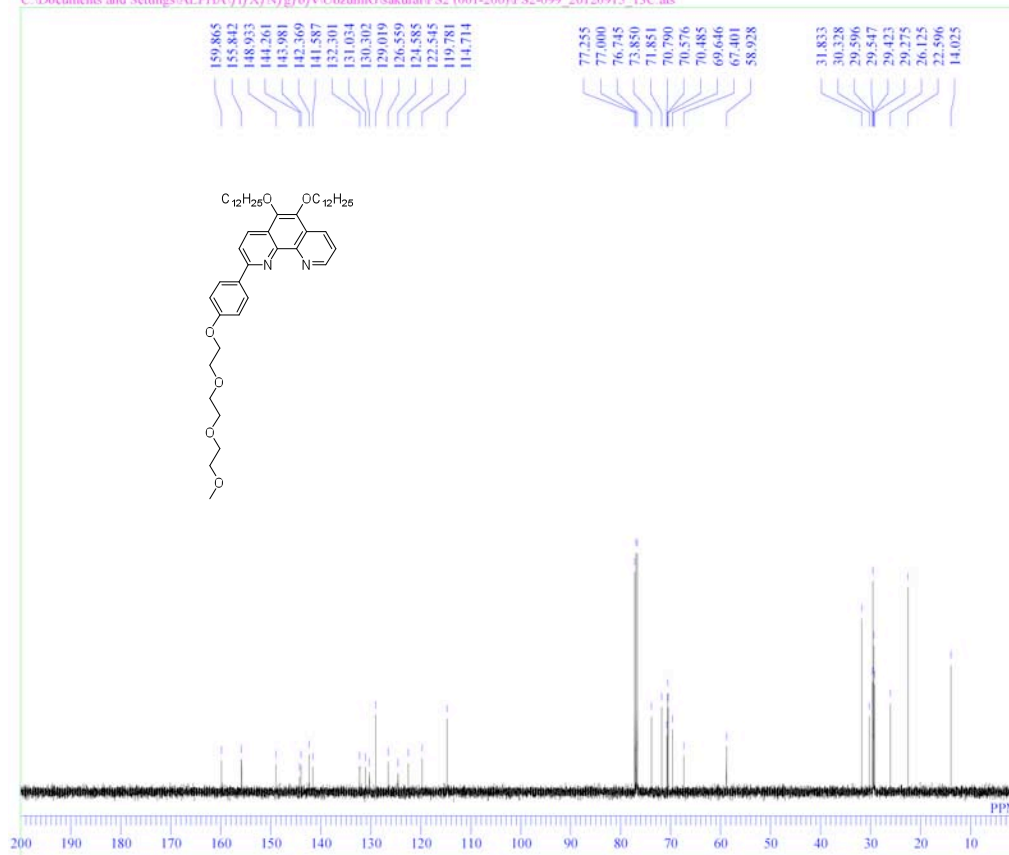

DFILE FS2-099\_20120915\_13C.als  
COMNT FS2-099\_20120915\_13C  
DATIM Sat Sep 15 14:45:44 2012  
OBNUC 13C  
EXMOD SINGL  
OBFRQ 125.65 MHz  
OBSET 0.00 KHz  
OBFIN 127958.00 Hz  
POINT 32768  
FREQU 33898.30 Hz  
SCANS 258  
ACQTM 0.9667 sec  
PD 1.0000 sec  
PW1 5.75 usec  
IRNUC 1H  
CTEMP 25.6 c  
SLVNT CDCL3  
EXREF 77.00 ppm  
BF 0.00 Hz  
RGAIN 27

# 5,6-Bis(dodecyloxy)-2,9-bis[4-[2-[2-(2-methoxyethoxy)ethoxy]ethoxy]phenyl]-1,10-phenanthroline (9)

FS2-118\_phen2b\_inversion

C:\Documents and Settings\ALPHA\1\X\N/g/b/v/Uozumi\G\sakurai\FS2 (001-200)\FS2-118\_phen2b\_inversion.als

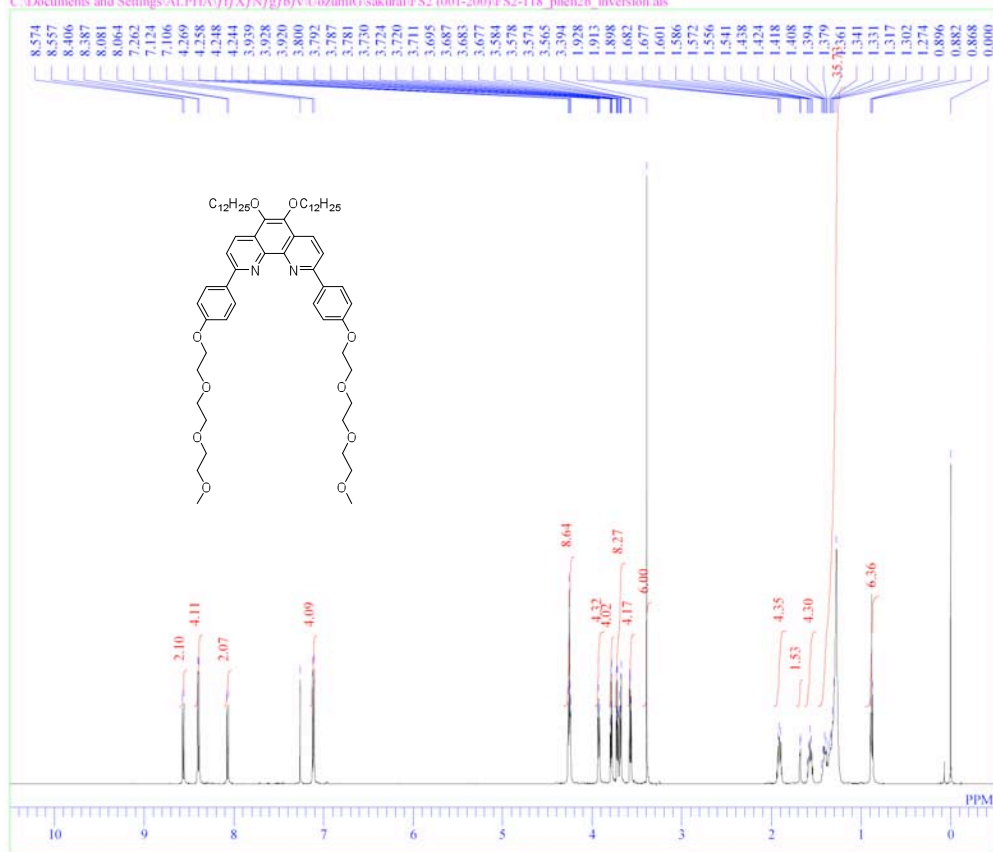

DFILE FS2-118\_phen2b\_inversion.als  
COMNT FS2-118\_phen2b\_inversion  
DATIM Mon Sep 24 10:17:13 2012  
OBNUC 1H  
EXMOD SINGL  
OBFREQ 500.00 MHz  
OBSET 0.00 KHz  
OBFIN 162410.00 Hz  
POINT 16384  
FREQU 10000.00 Hz  
SCANS 16  
ACQTM 1.6384 sec  
PD 2.0000 sec  
PWI 6.40 usec  
IRNUC 1H  
CTEMP 22.5 c  
SLVNT CDCL3  
EXREF 0.00 ppm  
BF 0.00 Hz  
RGAIN 18

C:\Documents and Settings\ALPHA\1\X\N/g/b/v/Uozumi\G\sakurai\FS2 (001-200)\FS2-118\_phen2b\_inversion\_13C.als

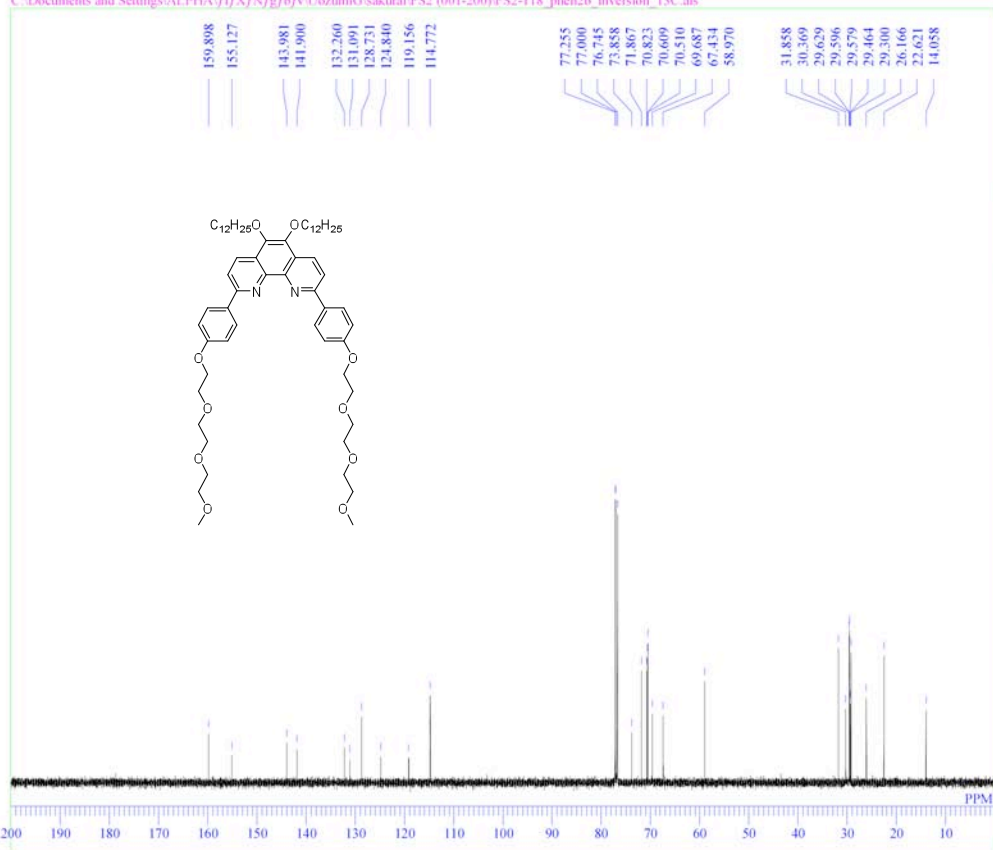

DFILE FS2-118\_phen2b\_inversion\_13C.als  
COMNT FS2-118\_phen2b\_inversion\_13C.als  
DATIM Mon Sep 24 15:28:42 2012  
OBNUC 13C  
EXMOD SINGL  
OBFREQ 125.65 MHz  
OBSET 0.00 KHz  
OBFIN 127958.00 Hz  
POINT 32768  
FREQU 33898.30 Hz  
SCANS 427  
ACQTM 0.9667 sec  
PD 1.0000 sec  
PWI 5.75 usec  
IRNUC 13C  
CTEMP 23.6 c  
SLVNT CDCL3  
EXREF 77.00 ppm  
BF 0.00 Hz  
RGAIN 26

S21

# Diphenylacetylene (12a)

## single\_pulse

Z:\UOZUMI\_G\sakurai\Sonogashira\diphenylacetylene-1H.als

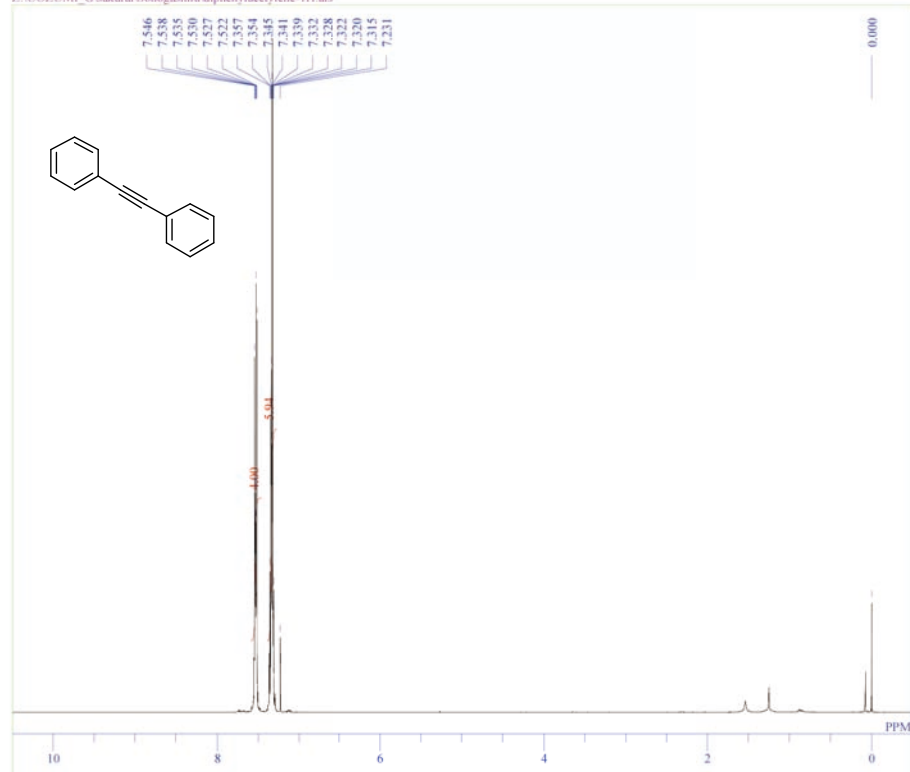

DFILE diphenylacetylene-1H.als  
 COMNT single\_pulse  
 DATIM 2013-06-20 15:25:39  
 OBNUC 1H  
 EXMOD proton.jsp  
 OBFREQ 395.88 MHz  
 OBSET 6.28 KHz  
 OBFIN 0.87 Hz  
 POINT 16384  
 FREQU 7422.80 Hz  
 SCANS 8  
 ACQTM 2.2073 sec  
 PD 5.0000 sec  
 PW1 3.12 usec  
 IRNUC 1H  
 CTEMP 19.0 c  
 SLVNT CDCL3  
 EXREF 0.00 ppm  
 BF 0.00 Hz  
 RGAIN 28

## single pulse decoupled gated NOE

Z:\UOZUMI\_G\sakurai\Sonogashira\diphenylacetylene-13C.als

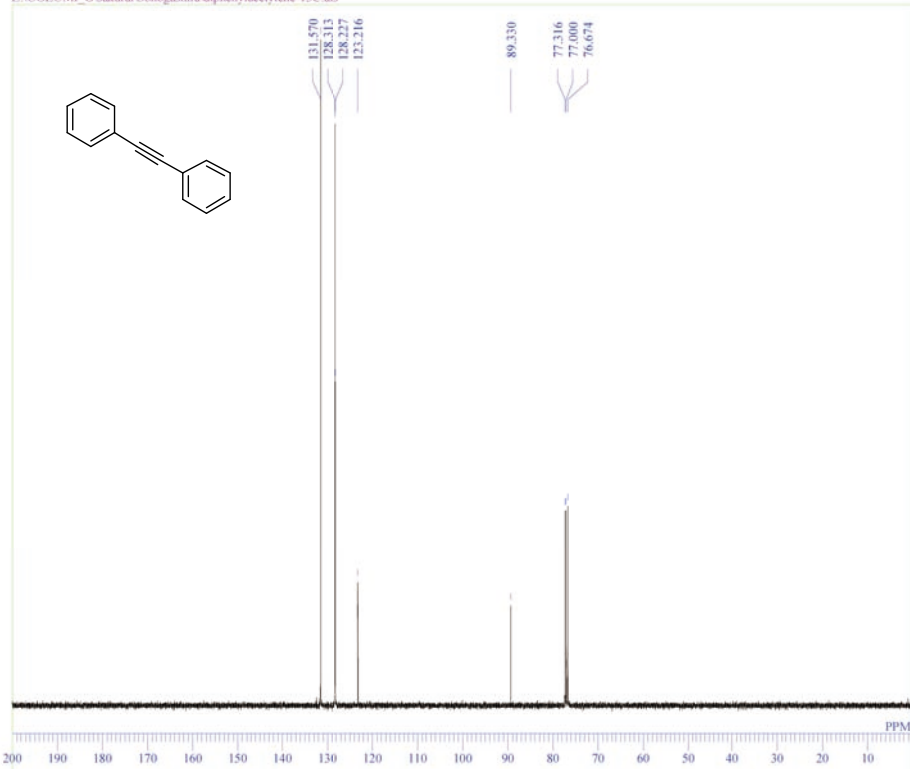

DFILE diphenylacetylene-13C.als  
 COMNT single pulse decoupled gated NOE  
 DATIM 2013-06-20 15:29:46  
 OBNUC 13C  
 EXMOD carbon.jsp  
 OBFREQ 99.55 MHz  
 OBSET 5.13 KHz  
 OBFIN 0.98 Hz  
 POINT 26214  
 FREQU 25000.00 Hz  
 SCANS 161  
 ACQTM 1.0486 sec  
 PD 2.0000 sec  
 PW1 3.42 usec  
 IRNUC 13C  
 CTEMP 19.5 c  
 SLVNT CDCL3  
 EXREF 77.00 ppm  
 BF 0.50 Hz  
 RGAIN 60



# 1-Phenyl-2-(*p*-trifluoromethylphenyl)acetylene (12b)

single\_pulse

Z:\UOZUMI\_G\sakurai\Sonogashira\4-CF3.als

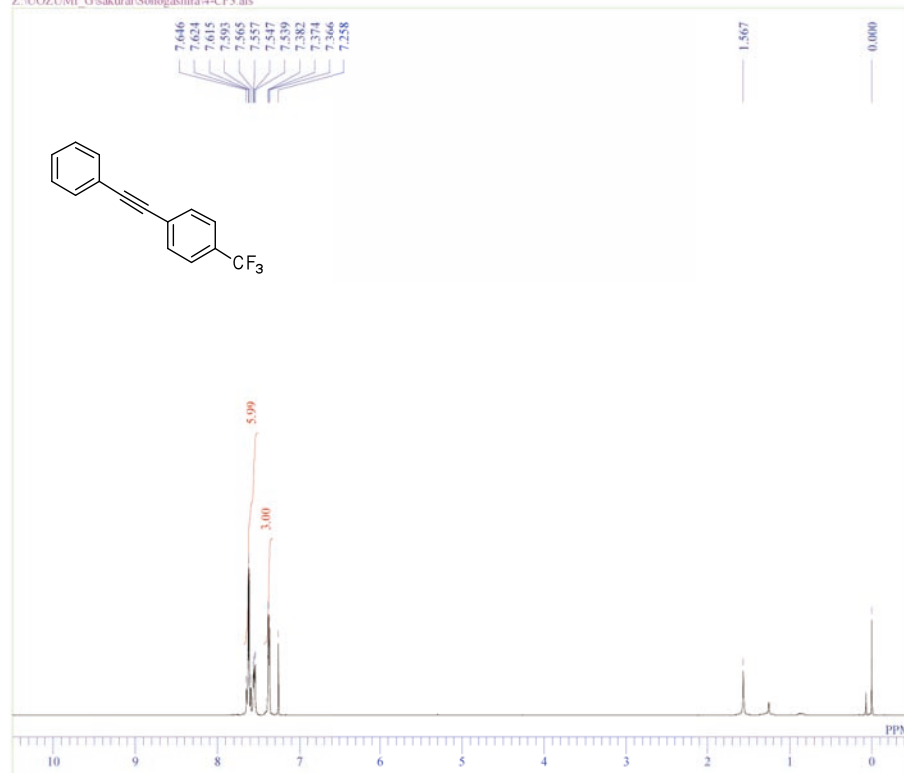

DFILE 4-CF3.als  
COMNT single\_pulse  
DATIM 2013-06-20 15:04:15  
OBNUC 1H  
EXMOD proton.jsp  
OBFREQ 395.88 MHz  
OBSET 6.28 KHz  
OBFIN 0.87 Hz  
POINT 13107  
FREQ 5938.24 Hz  
SCANS 8  
AQTM 2.2073 sec  
PD 5.0000 sec  
PW1 3.12 usec  
IRNUC 1H  
CTEMP 19.3 c  
SLVNT CDCL3  
EXREF 0.00 ppm  
BF 0.50 Hz  
RGAIN 40

single pulse decoupled gated NOE

Z:\UOZUMI\_G\sakurai\Sonogashira\4-CF3-13C.als

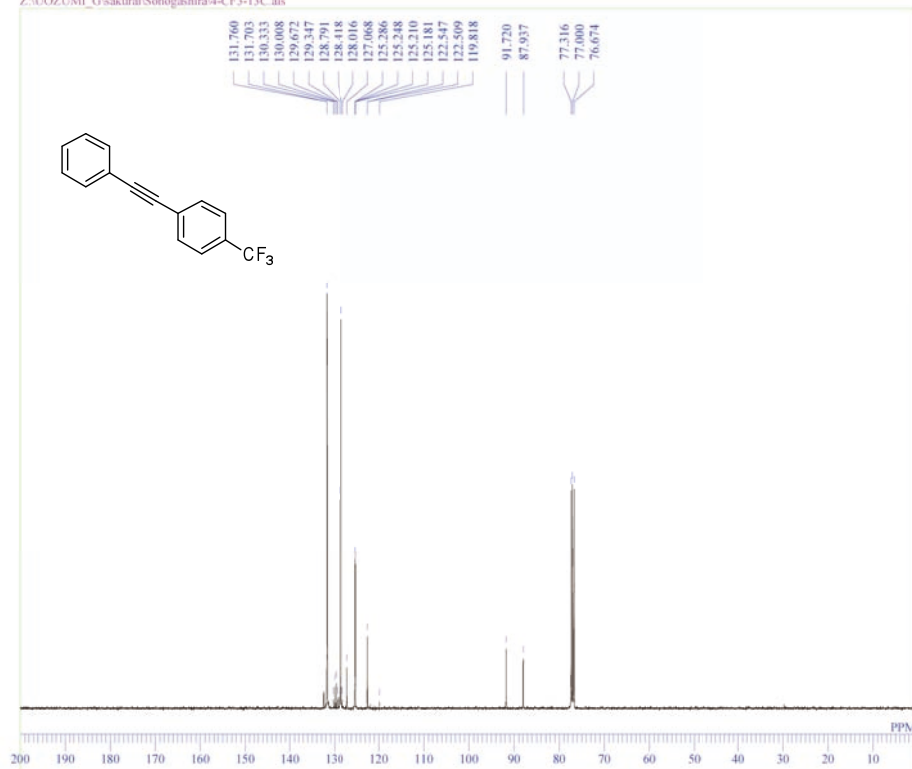

DFILE 4-CF3-13C.als  
COMNT single pulse decoupled gated NOE  
DATIM 2013-07-13 22:01:44  
OBNUC 13C  
EXMOD carbon.jsp  
OBFREQ 99.55 MHz  
OBSET 5.13 KHz  
OBFIN 0.98 Hz  
POINT 26224  
FREQ 25000.00 Hz  
SCANS 1024  
AQTM 1.0486 sec  
PD 2.0000 sec  
PW1 3.42 usec  
IRNUC 1H  
CTEMP 20.5 c  
SLVNT CDCL3  
EXREF 77.00 ppm  
BF 0.00 Hz  
RGAIN 60

# 1-(*p*-Methoxyphenyl)-2-phenylacetylene (12c)

## single\_pulse

Z:\UOZUMI\_G\sakurai\Sonogashira\4-MeO-1H.als

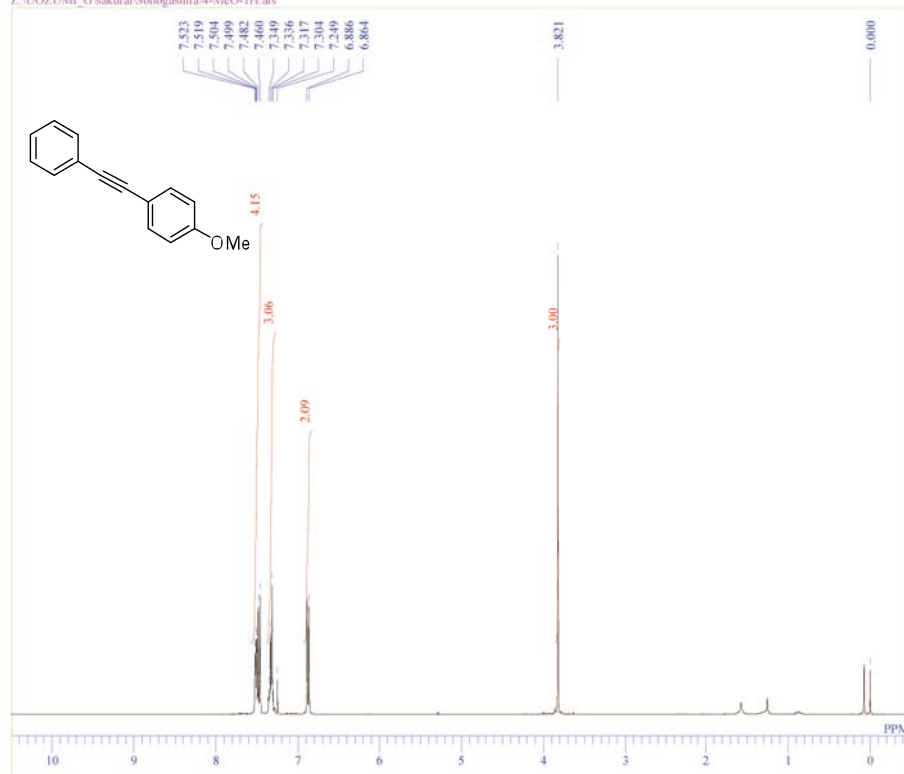

DFILE 4-MeO-1H.als  
 COMNT single\_pulse  
 DATIM 2013-06-21 13:29:46  
 OBNUC 1H  
 EXMOD proton.jsp  
 OBFRQ 395.88 MHz  
 OBSET 6.28 KHz  
 OBFIN 0.87 Hz  
 POINT 13107  
 FREQU 5938.24 Hz  
 SCANS 8  
 ACQTM 2.2073 sec  
 PD 5.0000 sec  
 PW1 3.12 usec  
 IRNUC 1H  
 CTEMP 19.4 c  
 SLVNT CDCL3  
 EXREF 0.00 ppm  
 BF 0.50 Hz  
 RGAIN 30

## single pulse decoupled gated NOE

Z:\UOZUMI\_G\sakurai\Sonogashira\4-MeO-13C.als

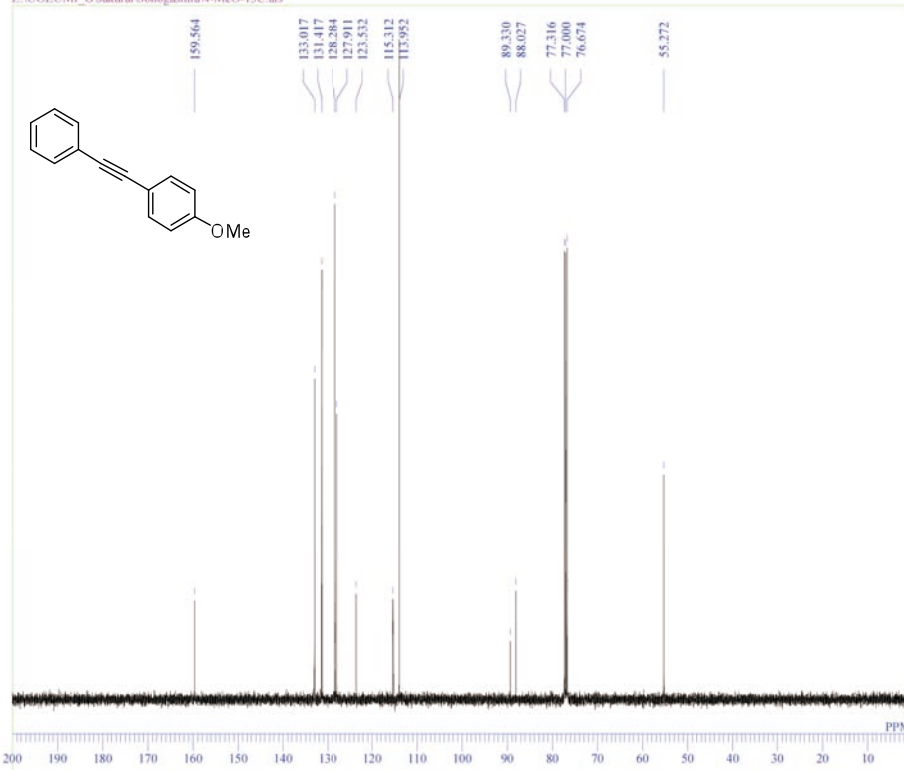

DFILE 4-MeO-13C.als  
 COMNT single pulse decoupled gated NOE  
 DATIM 2013-06-21 13:31:12  
 OBNUC 13C  
 EXMOD carbon.jsp  
 OBFRQ 99.55 MHz  
 OBSET 5.13 KHz  
 OBFIN 0.98 Hz  
 POINT 26214  
 FREQU 25000.00 Hz  
 SCANS 221  
 ACQTM 1.0486 sec  
 PD 2.0000 sec  
 PW1 3.42 usec  
 IRNUC 13C  
 CTEMP 19.4 c  
 SLVNT CDCL3  
 EXREF 77.00 ppm  
 BF 0.50 Hz  
 RGAIN 60



# 1-Phenyl-2-(*m*-tolyl)acetylene (12d)

## single\_pulse

Z:\UOZUMI\_G\sakurai\Sonogashira\3-Me-1H.als

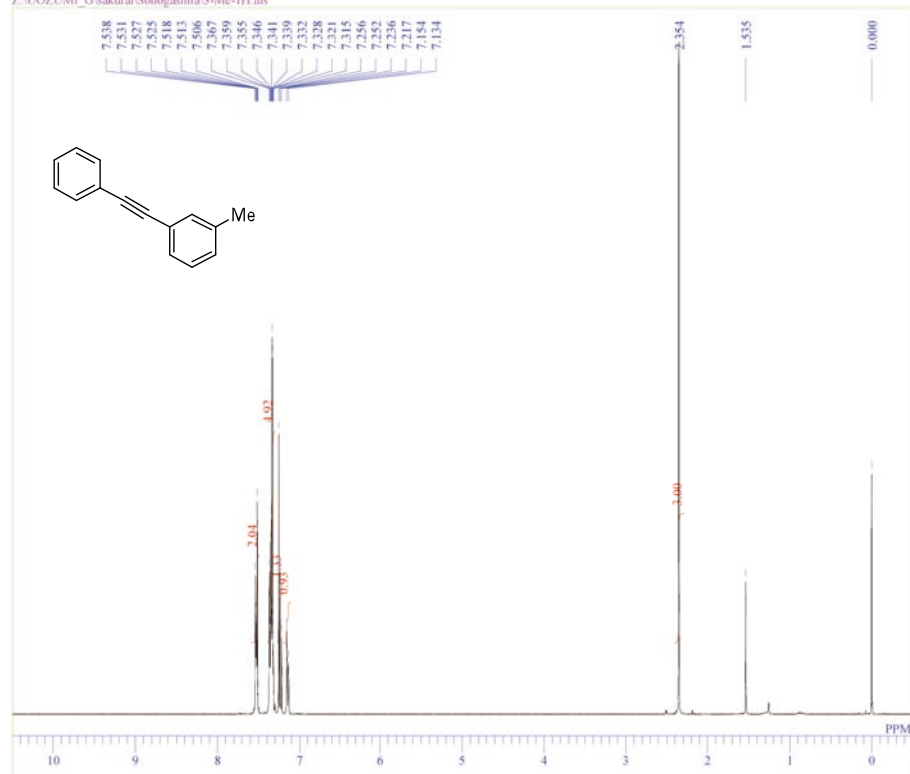

DFILE 3-Me-1H.als  
 COMNT single\_pulse  
 DATIM 2013-08-20 11:42:25  
 OBNUC 1H  
 EXMOD proton.jsp  
 OBFREQ 395.88 MHz  
 OBSET 6.28 KHz  
 OBFIN 0.87 Hz  
 POINT 13107  
 FREQU 5938.24 Hz  
 SCANS 8  
 ACQTM 2.2073 sec  
 PD 5.0000 sec  
 PW1 3.12 usec  
 IRNUC 1H  
 CTEMP 23.6 c  
 SLVNT CDCL3  
 EXREF 0.00 ppm  
 BF 0.00 Hz  
 RGAIN 38

## single pulse decoupled gated NOE

Z:\UOZUMI\_G\sakurai\Sonogashira\3-Me-13C.als

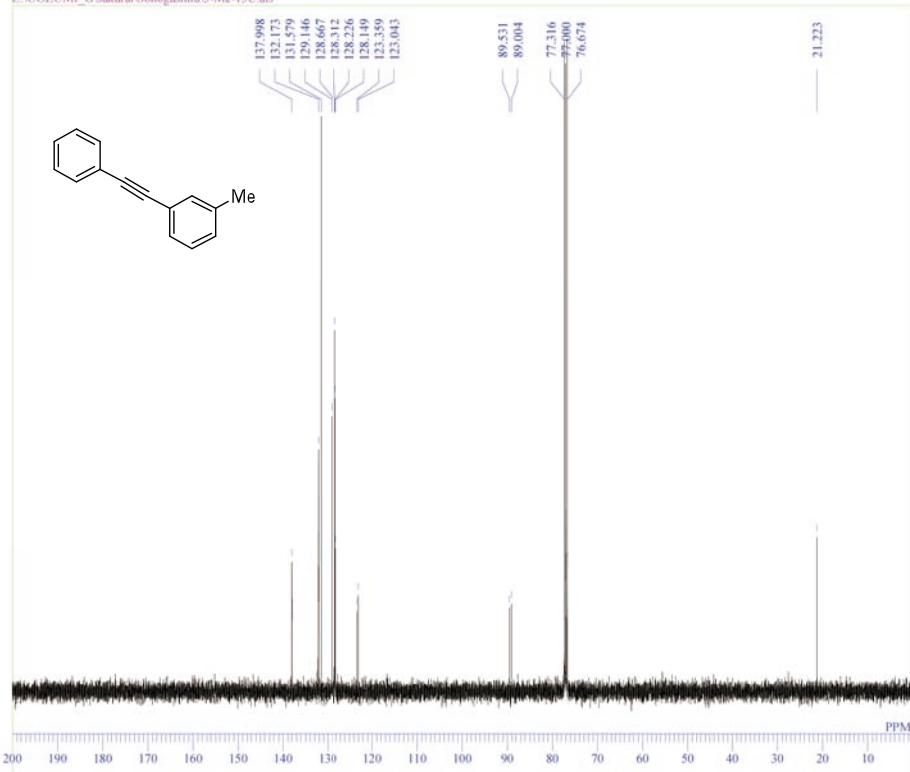

DFILE 3-Me-13C.als  
 COMNT single pulse decoupled gated NOE  
 DATIM 2013-08-20 11:44:48  
 OBNUC 13C  
 EXMOD carbon.jsp  
 OBFREQ 99.55 MHz  
 OBSET 5.13 KHz  
 OBFIN 0.98 Hz  
 POINT 32767  
 FREQU 31250.00 Hz  
 SCANS 211  
 ACQTM 1.0486 sec  
 PD 2.0000 sec  
 PW1 3.42 usec  
 IRNUC 13C  
 CTEMP 23.7 c  
 SLVNT CDCL3  
 EXREF 77.00 ppm  
 BF 0.30 Hz  
 RGAIN 60

# 1-Phenyl-2-(*o*-tolyl)acetylene (12e)

## single\_pulse

Z:\UOZUMI\_G\sakurai\Sonogashira\2-Me-1H.als

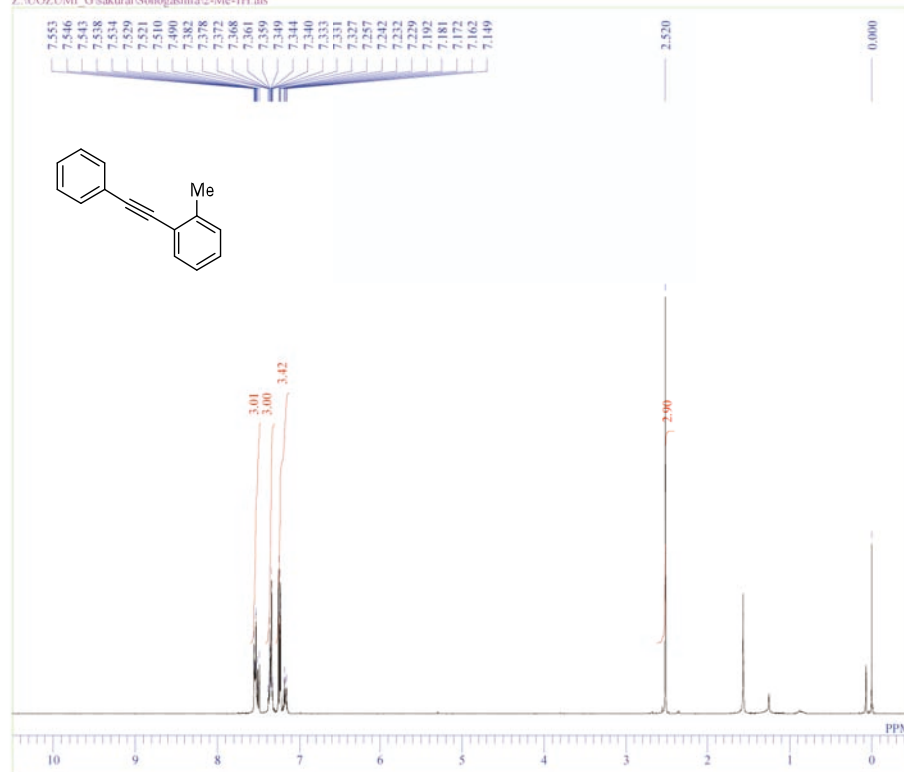

DFILE 2-Me-1H.als  
 COMNT single\_pulse  
 DATIM 2013-06-21 19:49:17  
 OBNUC 1H  
 EXMOD proton.jsp  
 OBFREQ 395.88 MHz  
 OBSET 6.28 KHz  
 OBFIN 0.87 Hz  
 POINT 13107  
 FREQU 5938.24 Hz  
 SCANS 8  
 ACQTM 2.2073 sec  
 PD 5.0000 sec  
 PW1 3.12 usec  
 IRNUC 1H  
 CTEMP 19.2 c  
 SLVNT CDCL3  
 EXREF 0.00 ppm  
 BF 0.00 Hz  
 RGAIN 40

## single pulse decoupled gated NOE

C:\Documents and Settings\ALPHA\I\X\N\g\b\U\ozumiG\sakurai\Sonogashira\2-Me-13C.als

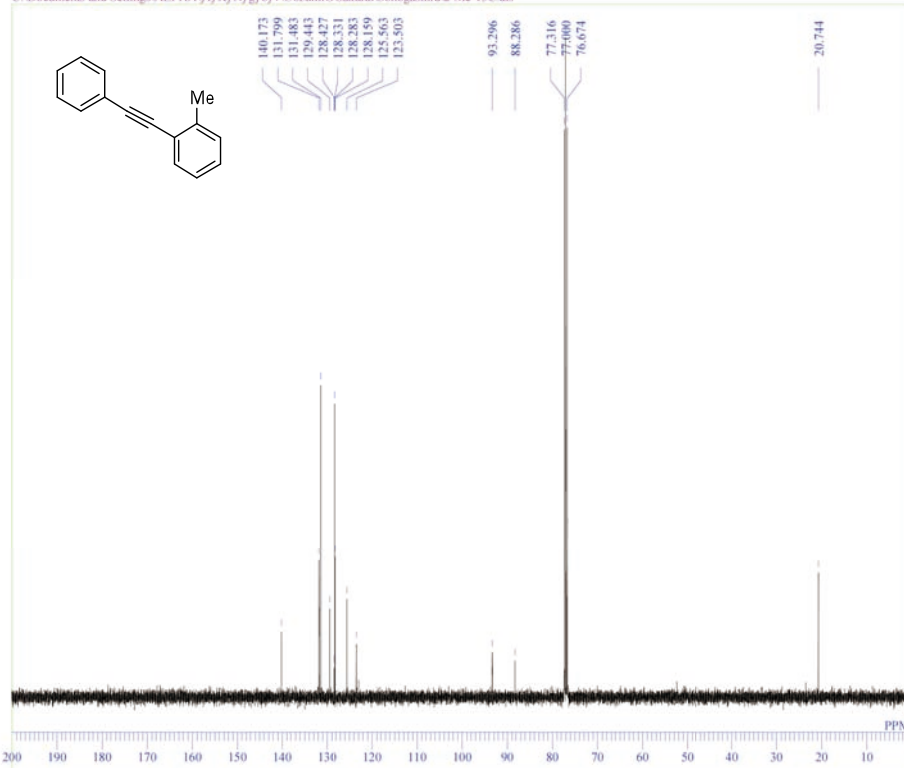

DFILE 2-Me-13C.als  
 COMNT single pulse decoupled gated NOE  
 DATIM 2013-06-21 19:51:42  
 OBNUC 13C  
 EXMOD carbon.jsp  
 OBFREQ 99.55 MHz  
 OBSET 5.13 KHz  
 OBFIN 0.98 Hz  
 POINT 32767  
 FREQU 31250.00 Hz  
 SCANS 512  
 ACQTM 1.0486 sec  
 PD 2.0000 sec  
 PW1 3.42 usec  
 IRNUC 1H  
 CTEMP 19.3 c  
 SLVNT CDCL3  
 EXREF 77.00 ppm  
 BF 0.20 Hz  
 RGAIN 60

### 1-(1-Naphthyl)-2-phenyl acetylene (12f)

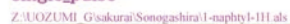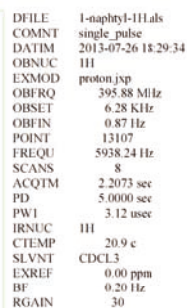

## Z:\UOZUMI\_G\sakurai\Sonogashira\1-naphtyl-13C.als

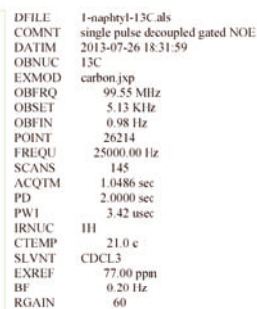

# 1-Phenyl-2-(2-thienyl)acetylene (12g)

## single\_pulse

Z:\UOZUMI\_G\sakurai\Sonogashira\thienyl-1H als

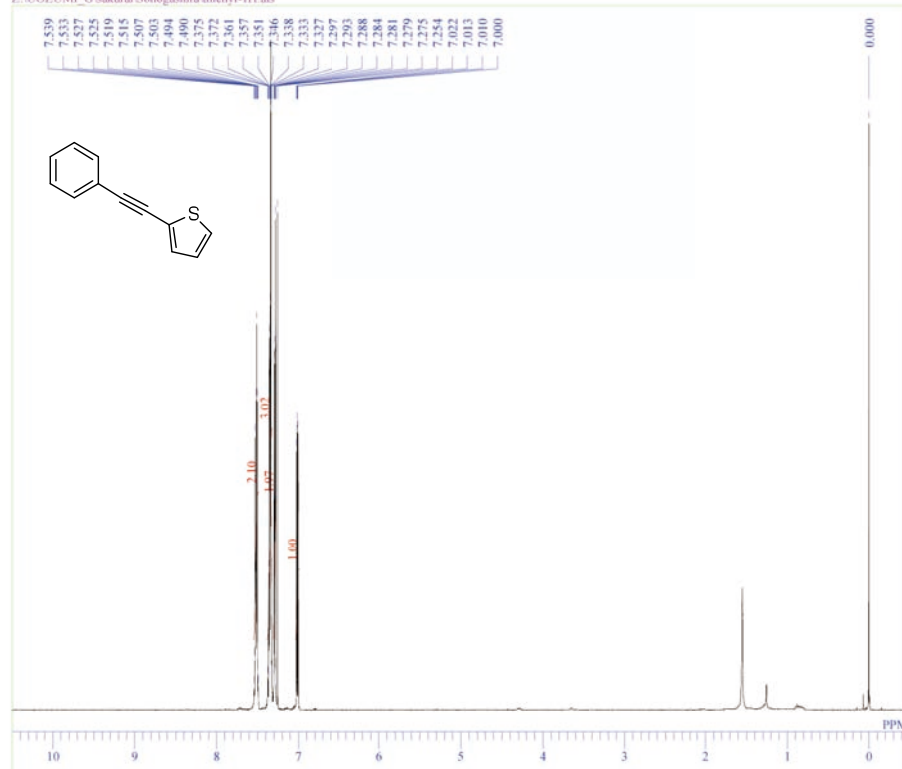

DFILE thienyl-1H als  
COMNT single\_pulse  
DATIM 2013-07-31 19:02:36  
OBNUC 1H  
EXMOD proton.jsp  
OBFRQ 395.88 MHz  
OBSET 6.28 KHz  
OBFIN 0.87 Hz  
POINT 13107  
FREQU 593.24 Hz  
SCANS 16  
ACQTM 2.2073 sec  
PD 5.0000 sec  
PW1 3.12 usec  
IRNUC 1H  
CTEMP 21.9 c  
SLVNT CDCL3  
EXREF 0.00 ppm  
BF 0.00 Hz  
RGAIN 40

## single pulse decoupled gated NOE

Z:\UOZUMI\_G\sakurai\Sonogashira\thienyl-13C als

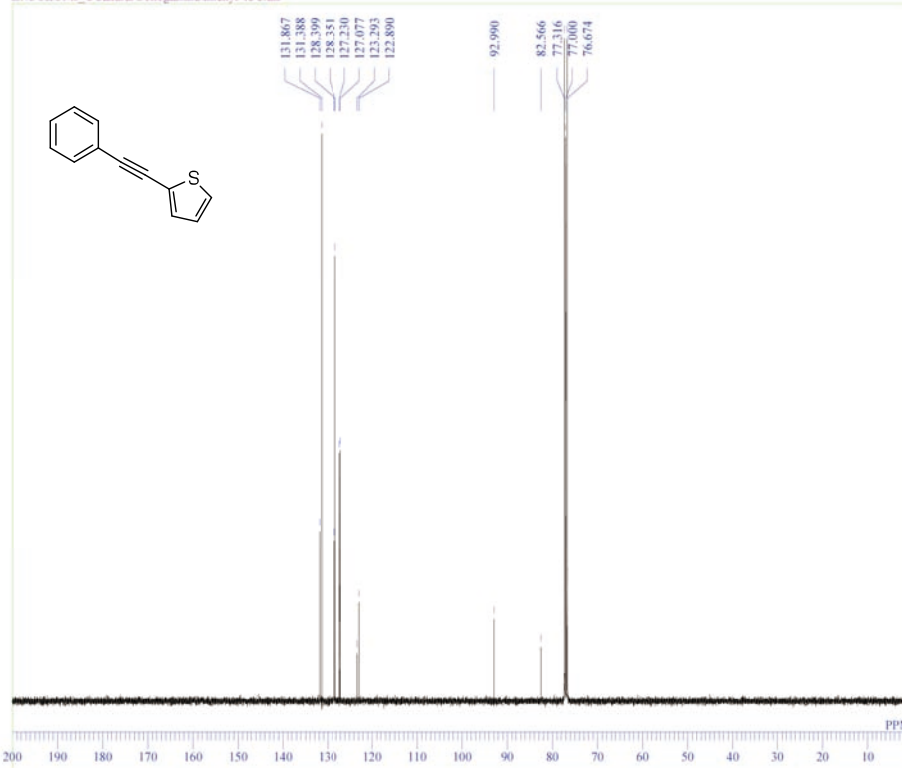

DFILE thienyl-13C als  
COMNT single pulse decoupled gated NOE  
DATIM 2013-07-31 19:05:06  
OBNUC 13C  
EXMOD carbon.jsp  
OBFRQ 99.55 MHz  
OBSET 5.13 KHz  
OBFIN 0.98 Hz  
POINT 26214  
FREQU 25000.00 Hz  
SCANS 1646  
ACQTM 1.0486 sec  
PD 2.0000 sec  
PW1 3.42 usec  
IRNUC 1H  
CTEMP 21.7 c  
SLVNT CDCL3  
EXREF 77.00 ppm  
BF 0.30 Hz  
RGAIN 60

# (1-Cyclohexenylethynyl)benzene (12h)

## single\_pulse

Z:\UOZUMI\_G\sakurai\Sonogashira\cyclohexenyl-1H.als

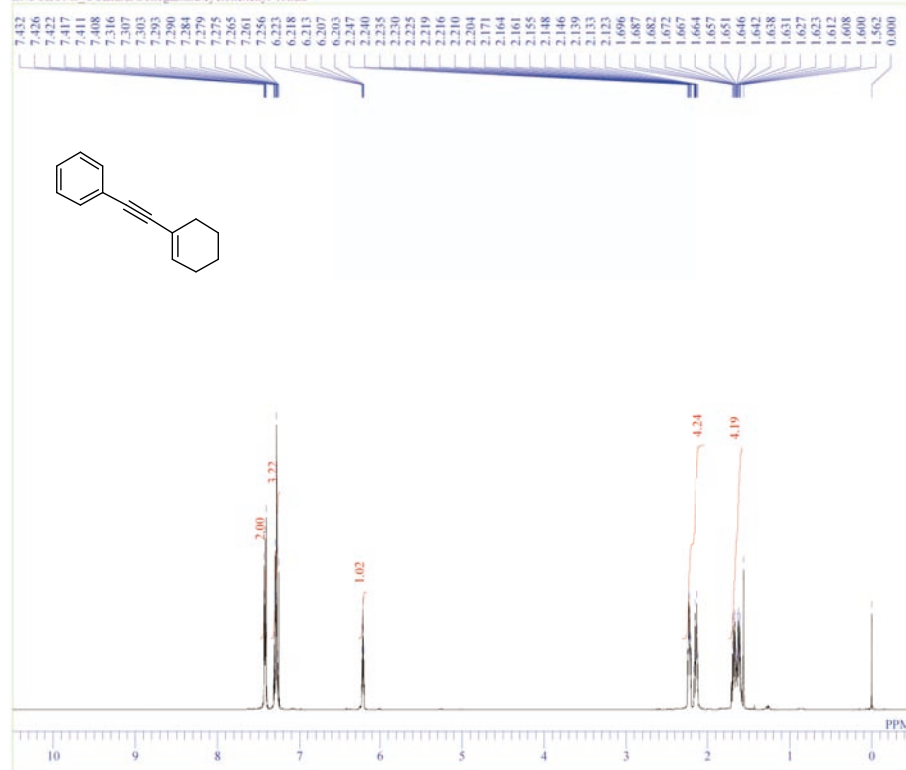

DFILE cyclohexenyl-1H.als  
COMNT single\_pulse  
DATIM 2013-06-21 20:23:34  
IH  
EXMOD proton.jsp  
OBFRQ 395.88 MHz  
OBSET 6.28 KHz  
OBFIN 0.87 Hz  
POINT 13107  
FREQU 5938.24 Hz  
SCANS 8  
ACQTM 2.2073 sec  
PD 5.0000 sec  
PWI 3.12 usec  
IRNUC IH  
CTEMP 19.0 c  
SLVNT CDCL3  
EXREF 0.00 ppm  
BF 0.00 Hz  
RGAIN 30

## single pulse decoupled gated NOE

Z:\UOZUMI\_G\sakurai\Sonogashira\cyclohexenyl-13C.als

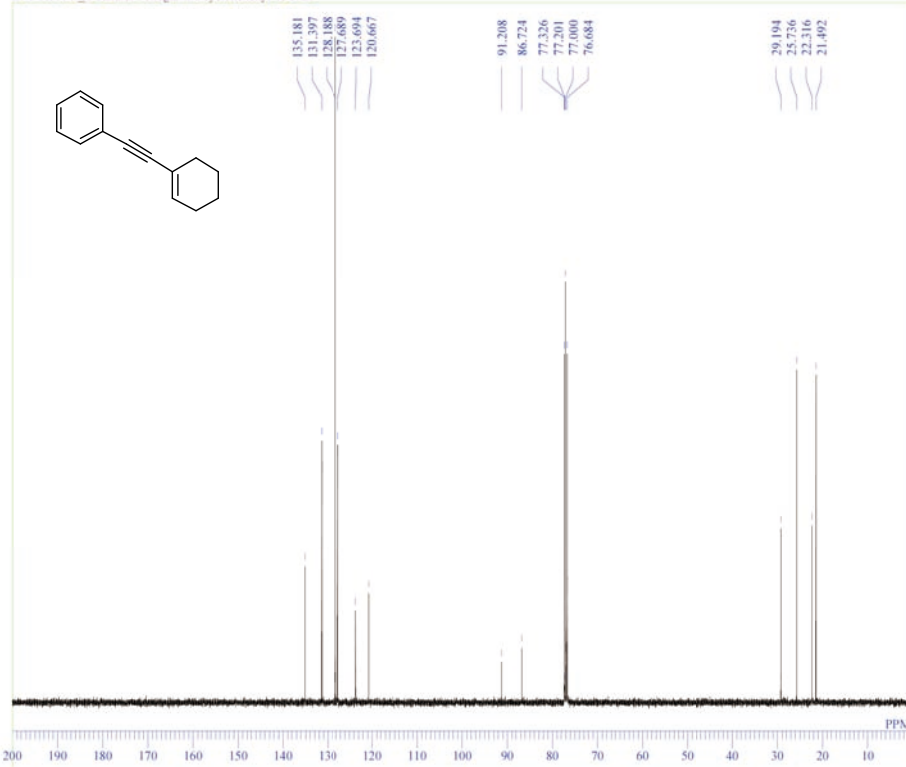

DFILE cyclohexenyl-13C.als  
COMNT single pulse decoupled gated NOE  
DATIM 2013-06-21 20:24:60  
13C  
EXMOD carbon.jsp  
OBFRQ 99.55 MHz  
OBSET 5.13 KHz  
OBFIN 0.98 Hz  
POINT 32767  
FREQU 31250.00 Hz  
SCANS 512  
ACQTM 1.0486 sec  
PD 2.0000 sec  
PWI 3.42 usec  
IRNUC IH  
CTEMP 19.0 c  
SLVNT CDCL3  
EXREF 77.00 ppm  
BF 0.40 Hz  
RGAIN 60

# 1-Heptyn-1-yl-benzene

## single\_pulse

Z:\UOZUMI\_G\sakurai\FS6-186\_proton-1-1.als

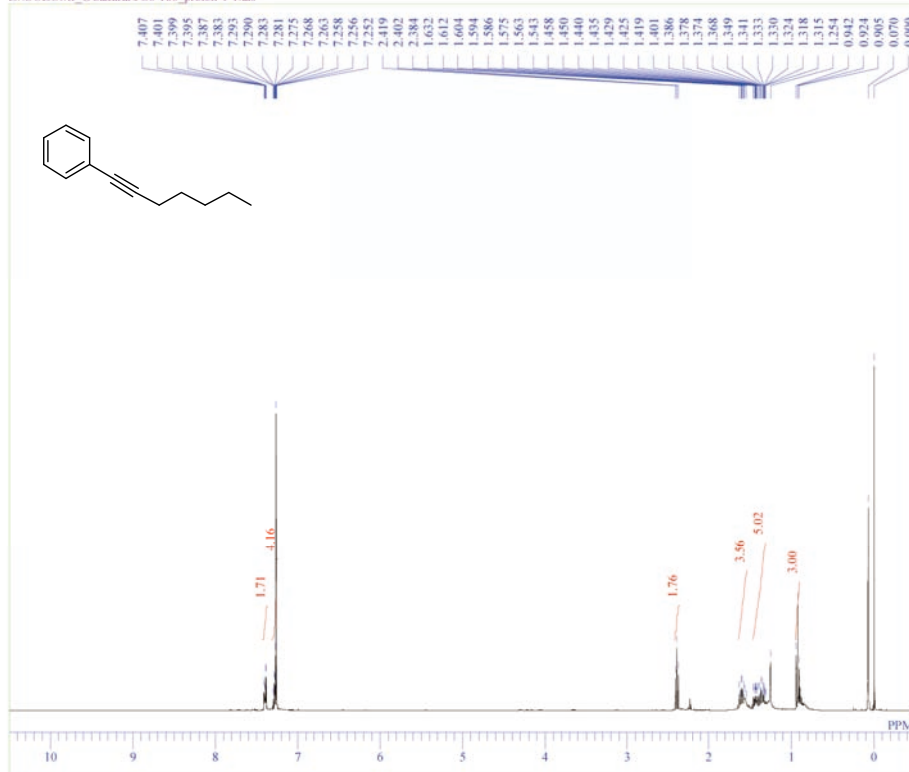

DFILE FS6-186\_proton-1-1.als  
COMINT single\_pulse  
DATIM 2015-02-18 18:14:46  
OBNUC 1H  
EXMOD proton.jsp  
OBFREQ 395.88 MHz  
OBSET 6.28 KHz  
OBFIN 0.87 Hz  
POINT 13107  
FREQU 5938.24 Hz  
SCANS 16  
ACQTM 2.2073 sec  
PD 5.0000 sec  
PW1 3.12 usec  
IRNUC 1H  
CTEMP 18.5 c  
SLVNT CDCL3  
EXREF 0.00 ppm  
BF 0.00 Hz  
RGAIN 40

## single pulse decoupled gated NOE

Z:\UOZUMI\_G\sakurai\FS6-186-2\_carbon-1-1.als

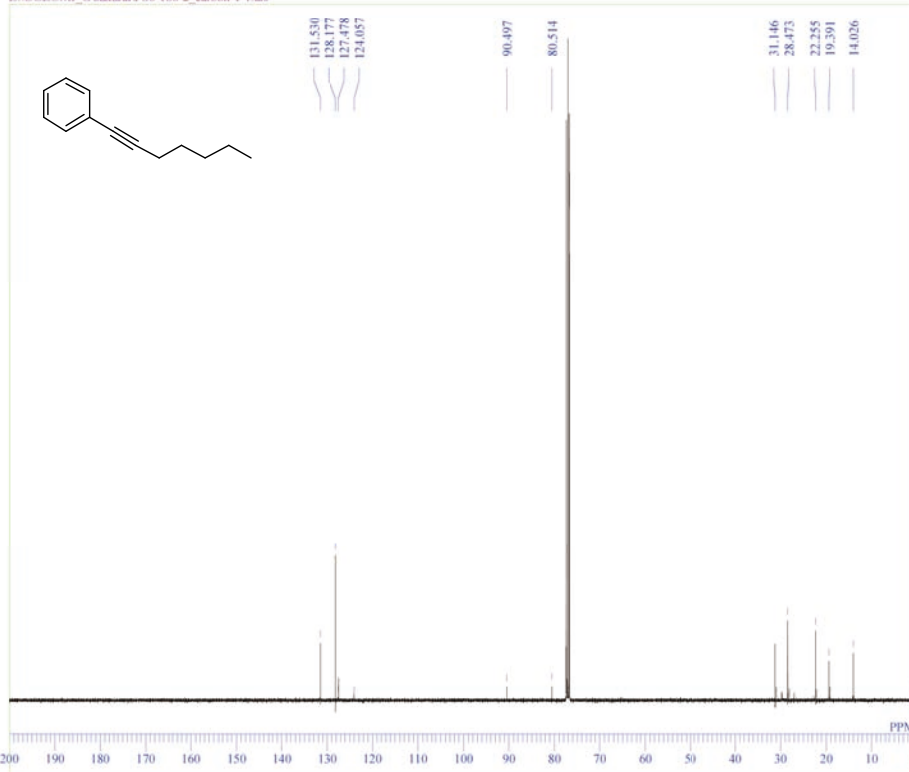

DFILE FS6-186-2\_carbon-1-1.als  
COMINT single pulse decoupled gated NOE  
DATIM 2015-02-19 00:25:04  
OBNUC 13C  
EXMOD carbon.jsp  
OBFREQ 99.55 MHz  
OBSET 5.13 KHz  
OBFIN 0.98 Hz  
POINT 26214  
FREQU 25000.00 Hz  
SCANS 10000  
ACQTM 1.0486 sec  
PD 2.0000 sec  
PW1 3.42 usec  
IRNUC 13C  
CTEMP 19.7 c  
SLVNT CDCL3  
EXREF 0.00 ppm  
BF 0.00 Hz  
RGAIN 60
